# Supplementary material for: Evaluating workforce developments to support children of mentally ill parents: implementing new interventions in the adult mental healthcare in Northern Norway
Source: PubMed Central journal article supplement — BMJ Open. 2012 May 3;2(3):e000709. doi: 10.1136/bmjopen-2011-000709 (PMC3346943; doi:10.1136/bmjopen-2011-000709), 2012-05-03
Supplement: bmjopen-2011-000709.draft_revisions.pdf [file bmjopen-2011-000709.draft_revisions.pdf]

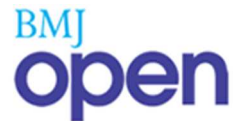

**Evaluating Workforce Developments to Support Children of Mentally Ill Parents: Implementing new interventions in the Adult Mental Health Care in Northern Norway.**

|                                 |                                                                                                                                                                                                                                                                                                                                           |
|---------------------------------|-------------------------------------------------------------------------------------------------------------------------------------------------------------------------------------------------------------------------------------------------------------------------------------------------------------------------------------------|
| Journal:                        | <i>BMJ Open</i>                                                                                                                                                                                                                                                                                                                           |
| Manuscript ID:                  | bmjopen-2011-000709                                                                                                                                                                                                                                                                                                                       |
| Article Type:                   | Protocol                                                                                                                                                                                                                                                                                                                                  |
| Date Submitted by the Author:   | 30-Nov-2011                                                                                                                                                                                                                                                                                                                               |
| Complete List of Authors:       | Reedtz, Charlotte; University of Tromso, Regional Centre for Child and Youth Mental Health and Child Welfare<br>Lauritzen, Camilla; University of Tromso, Regional Centre for Child and Youth Mental Health and Child Welfare<br>Doesum, Karin; University of Tromso, Regional Centre for Child and Youth Mental Health and Child Welfare |
| <b>Primary Subject Heading</b>: | Health services research                                                                                                                                                                                                                                                                                                                  |
| Secondary Subject Heading:      | Mental health, Public health                                                                                                                                                                                                                                                                                                              |
| Keywords:                       | Quality in health care < HEALTH SERVICES ADMINISTRATION & MANAGEMENT, MENTAL HEALTH, Adult psychiatry < PSYCHIATRY, Child protection < PAEDIATRICS                                                                                                                                                                                        |
|                                 |                                                                                                                                                                                                                                                                                                                                           |

SCHOLARONE™  
Manuscripts

Only

1  
2  
3  
4  
5  
6 Evaluating Workforce Developments to Support Children of Mentally Ill Parents: Implementing new  
7  
8 interventions in the Adult Mental Health Care in Northern Norway.  
9

10 Charlotte Reedtz<sup>1</sup>, Camilla Lauritzen<sup>1</sup> and Karin TM van Doesum<sup>1,2,3</sup>  
11

12 Universitetet i Tromsø,  
13  
14  
15  
16  
17  
18  
19  
20  
21

### 22 **Author details**

23  
24  
25  
26 <sup>1</sup> Regional centre for child and youth mental health and child welfare, Faculty of Health  
27  
28 Sciences, University of Tromsø.  
29

30  
31  
32 <sup>2</sup> Behavioural Science Institute, Radboud University Nijmegen, the Netherlands.  
33

34 <sup>3</sup> Dimence Community Mental Health centre, Deventer, The Netherlands.  
35  
36  
37  
38  
39  
40

41 Correspondence concerning this article should be addressed to Charlotte Reedtz,  
42  
43 Regional centre for child and youth mental health and child welfare, Faculty of Health  
44  
45 Sciences, University of Tromsø, 9037 Tromsø, Norway. E-mail: charlotte.reedtz@uit.no  
46  
47  
48  
49  
50  
51  
52  
53  
54  
55  
56  
57  
58  
59  
60

## Abstract

**Introduction:** This article describes the study protocol of implementing the interventions Family Assessment and Child Talks for children of patients in the adult psychiatry of the University Hospital of Northern Norway. **Methods/Design:** There are two groups of participants in this study; a) mental health workers in the clinic ( $N = 220$ ), and b) patients who are parents ( $N = 200$ ) receiving treatment in the clinic. **Analysis:** a) In the evaluation of clinical practice, we will use a pre-test post-test one-year follow-up design. At pre-test we will evaluate status quo among mental health workers in the clinic regarding knowledge, attitudes, collaborative routines and clinical practice related to families with parental mental illness. After the pre-test is finished the project will move on to implement the interventions *Family Assessment Form* and *Child Talks* in the clinic. At post-test and one year follow-up we will evaluate the impact of implementing the *Family Assessment Form* in terms of how many children were identified and offered Child Talks in the clinic or referred to other services for additional support. b) In the evaluation of parents/patients experience with the interventions, we will use a pre-test post-test design. To identify children of mentally ill patients we collect data on demographical variables for the patient and the child at pre measures, as well as data on parental competence and parental concerns about their children. At post measures we evaluate the impact of the intervention in terms of user satisfaction, as well as changes between pre- and post measures on parental competence and parental concerns about their children. **Ethics and dissemination:** The study is approved by relevant ethic committees. The research group has planned five publications from the project, resulting in one PhD degree.

## Background

This article describes the study protocol of implementing the interventions Family Assessment and Child Talks for children of patients in the adult psychiatry of the University Hospital of Northern Norway (UNN).

Children of parents with a mental illness (COPMI) are recognized as a large risk group. The Norwegian Institute of Public Health has estimated the number of children in this group, based on prevalence studies of how many of the entire adult population qualify for a diagnosis of mental disorder or alcohol abuse disorder [1]. They estimated that as much as 410 000 children in Norway (37.3%) had either one or two parents with a mental illness, and 90 000 children (8.3%) had at least one alcohol abusing parent. Many studies have indicated that children with mentally ill parents or parents with substance abuse disorder are at risk of developing mental health problems themselves [2, 3, 4, 5]. More than one third of these children develop serious and long-lasting problems. Early in life, these children run a higher risk of abuse and neglect, depression, eating disorders, conduct problems and academic failure. Later in life, they are at a higher risk of depression, anxiety disorders, substance abuse, eating problems and personality disorders [6, 7, 8, 1]. A study by Clark and colleagues [9] among 6-14-year-old children of parents with substance abuse disorder showed that these children have increased rates of conduct disorders, ADHD, and depressive and anxiety disorder.

Though the preventive role of protective factors and resiliency in the socio-emotional development of children has been studied extensively and are recognized in developmental psychology, little research has been conducted to evaluate their role in the transmission of parental psychopathology. However, research has documented that the

1  
2  
3 trans generational transmission of psychiatric risk is significantly mediated by the way  
4  
5 parents interact with their children and by lack of core parenting skills. Numerous studies  
6  
7 have revealed that dysfunctional family interaction, insensitive responsiveness, low  
8  
9 involvement with the child, low monitoring and hostility as well as child maltreatment,  
10  
11 may result from parental psychopathology [10, 11, 12, 13]. It is especially when these  
12  
13 behavioural patterns are present during the early years of life that they trigger  
14  
15 dysregulated emotion patterns, negative emotionality, insecure attachment and decreased  
16  
17 perceived competence in children [14, 15, 16, 17, 18, 19, 20].  
18  
19  
20  
21

22 In order to develop preventive interventions for these children we have to focus  
23  
24 on the malleability of psychological and social risk and to improve protective factors, for  
25  
26 instance parenting behaviour, social support and coping skills. Internationally there are  
27  
28 already various examples of intervention programs available and there is now an  
29  
30 expanding evidence base to demonstrate the effectiveness of a number of interventions  
31  
32 focused at children of mentally ill parents [e.g., 21, 22, 23, 24]. A number of empirical  
33  
34 articles published in the course of the past decade have emphasized that parenting  
35  
36 programs are among the most powerful and cost-effective interventions available to  
37  
38 prevent child maltreatment and socio-emotional and behavioral problems in children [11,  
39  
40  
41  
42  
43  
44  
45  
46  
47  
48  
49  
50  
51  
52  
53  
54  
55  
56  
57  
58  
59  
60  
25].

46 In spite of the fact that the risk factors for these children are known, there is a  
47  
48 consensus among professionals in the field and the Norwegian government that health  
49  
50 professionals have not yet been able to establish a change of practice so that children of  
51  
52 mentally ill parents are identified and offered preventive support and adequate help. A  
53  
54 Norwegian study has indicated that the services available to these children are  
55  
56  
57  
58  
59  
60

1  
2  
3 insufficient [26]. Furthermore, research on the outcomes of different interventions for this  
4  
5 group of children and youngsters is scarce. However, before researchers are in a position  
6  
7 to evaluate the different interventions to prevent the trans generational transference of  
8  
9 mental health problems, these interventions have to be put into wider use. In order to  
10  
11 conduct research to evaluate the health promoting and preventing effects of interventions  
12  
13 in the COPMI field, it is a prerequisite that relevant changes in clinical practice to  
14  
15 identify and offer children adequate support have been implemented. The challenges with  
16  
17 such an effort are threefold. Firstly, there is a lack of awareness in adult mental health  
18  
19 services that their clients may have children. Many wards have no routine recording of  
20  
21 whether or not the client has children. Secondly, adult mental health workers are not  
22  
23 educated to discuss parenting skills and to involve children in the treatment of the patient.  
24  
25 Thirdly, the funding of the health services is based on client contacts and the children are  
26  
27 not clients in the adult health care service. Children will only come to the attention of the  
28  
29 health care system when they have already developed problems and need child mental  
30  
31 health care [27].The commission documents for the Norwegian regional public health  
32  
33 care, state that children with mentally ill parents or parents with substance abuse disorder  
34  
35 are entitled to adequate help. Furthermore, several changes in relevant laws [28] have  
36  
37 been made in order to meet these children's needs in the adult mental health care. One of  
38  
39 the changes implied that all wards in the adult health care should have personnel  
40  
41 responsible for the children (child contact persons) of the patients in the unit/ward. The  
42  
43 new legislation became effective in January 2010. Therefore, important challenges in the  
44  
45 Norwegian adult mental health service is to make sure that these children are identified,  
46  
47 and that they get the support to which they are entitled.  
48  
49  
50  
51  
52  
53  
54  
55  
56  
57  
58  
59  
60

1  
2  
3  
4 In order to meet the challenges related to patients who are parents and their  
5  
6 children, and to meet the requirements of the law, it is crucial that new routines are  
7  
8 established and new interventions utilized in the field of practice. The most efficient way  
9  
10 for establishing new routines and interventions in an organization is by introducing and  
11  
12 implementing interventions that are well described [29], even if the outcomes of the  
13  
14 interventions might not yet be evaluated. In this particular project, RKBU North focuses  
15  
16 attention on an intervention for children of mentally ill parents; Child Talks, which has  
17  
18 been adopted for Norway by the organization Adults for Children. Child Talks involves  
19  
20 2-3 sessions with parents and children and aims at supporting parents in their parenting  
21  
22 role and thereby supporting the children. Experiences and outcomes of implementation  
23  
24 processes have yet to be studied in a systematic way in Norway, and still little is known  
25  
26 about the contextual factors that may promote or hinder the sustainability of the  
27  
28 implementation of new interventions [30, 31].  
29  
30  
31  
32  
33

34 In brief, the current study aims to establish a change of practice in mental health care services  
35  
36 for adults through implementing a family focused assessment form and the intervention Child  
37  
38 Talks as a routine service in adult mental health care. The family focused assessment form will  
39  
40 be used as a tool to identify the children and families who are in need of more support and  
41  
42 help, and the intervention will provide support for the patients and their children. Both the  
43  
44 implementation process and parent's experiences with the intervention will be assessed. This  
45  
46 will be the first large scale implementation study on this topic in Norway.  
47  
48  
49  
50  
51  
52  
53  
54  
55  
56  
57  
58  
59  
60

### Objective of the study and research questions

The project will evaluate the process of changes in clinical practice, as well as which impact the implemented intervention has on parental competence and parental concerns.

### Research questions for the process evaluation of clinical practice:

1. Will implementation of the Family Assessment Form lead to identification of children of parents with mental illness?
2. Will implementation of the intervention *Child Talks* lead to changes among mental health workers in the clinic in terms of knowledge, attitudes, collaborative routines and clinical practice?
3. Is the intervention delivered according to the protocol?
4. What do mental health workers in the clinic expect from the interventions, and do they believe it will be effective?

### Research questions for the evaluation of the interventions impact on parents

1. Which experiences do patients who are parents have with the intervention *Child Talks* in terms of user satisfaction?
2. Will the intervention *Child Talks* have an impact on patients who are parents in terms of parental competence?
3. Will the intervention *Child Talks* have an impact on patients who are parents in terms of and parental concerns?



## Methods

### Participants

There are two main groups of participants in this study. The first group is mental health workers in the clinic ( $N = 220$ ), ranging from psychiatric nurses, psychologists, psychiatrists, social workers and different assistants. The second group of participants patients who are parents ( $N = 200$ ) receiving treatment in the clinic.

### Recruitment

The mental health workers in the clinic are recruited by the formal inclusion of the clinic in the research project. The management in the clinic has signed a contract for the collaboration with the research group, and all mental health workers are encouraged to answer the web-based questionnaires.

Regarding the first intervention, parts of the *Family Assessment Form* for patients/parents is mandatory according to the law. The scales implemented in addition to that are made obligatory for all patients as part of the clinics quality assurance evaluation of clinical practice. Regarding the second intervention, *Child Talks*, parents receiving treatment in the clinic are recruited to receive the intervention by the mental health worker who assess the patient using the *Family Assessment Form*.

### Procedure

**Process evaluation.** This study will use a pre-test post-test with a one-year follow-up design. At pre-test we will evaluate status quo among mental health workers in the clinic

1  
2  
3 regarding knowledge, attitudes, collaborative routines and clinical practice related to families  
4  
5 with parental mental illness. The expectations of the mental health workers regarding the  
6  
7 interventions will also be evaluated. This will be accomplished by web-based questionnaires  
8  
9 for all staff.  
10

11  
12 After the pre-test is finished the project will move on to implement the interventions  
13  
14 *Family Assessment Form* and *Child Talks* in the clinic. The implementation starts with training  
15  
16 mental health workers in the interventions. The organisation Adults for Children will be  
17  
18 responsible for training and supervision of personnel in the clinic.  
19  
20

21  
22 At post-test and one year follow-up we will evaluate the impact of implementing the  
23  
24 *Family Assessment Form* in terms of how many children were identified and offered Child  
25  
26 Talks in the clinic or referred to other services for additional support. This will be elicited by  
27  
28 analyzing the content of *Family Assessment Form* for all patients in the clinic. The impact of  
29  
30 the intervention *Child Talks* will be evaluated in terms of changes of clinical practice among  
31  
32 mental health workers in the clinic, as well as expectations regarding the interventions. This  
33  
34 will be accomplished by web-based questionnaires. At one year follow-up we will evaluate if  
35  
36 changes in clinical practice are sustained.  
37  
38  
39

40  
41 **Evaluation of the interventions impact on patients who are parents.** The design for  
42  
43 this group is a pre-post design. Patients will complete the family assessment form once they are  
44  
45 admitted to treatment in the clinic. Questions about Parental concern (PEDS) [32] and parental  
46  
47 competence (PSOC) [33] will be included in the family assessment questionnaire at pre-test.  
48  
49 The rationale for including the two latter scales is that information from parents relatively  
50  
51 correctly describes the emotional, social and behavioral development of their children.  
52  
53  
54  
55  
56  
57  
58  
59  
60  
60 Researchers have demonstrated that most children with significant socio-emotional and

1  
2  
3 behavior problems are shown to have parents with concerns, and that parents' concerns are  
4  
5 often as accurate as quality screening [34]. Furthermore, parent satisfaction (i.e. parents'  
6  
7 enjoyment of the parenting role) is negatively related to externalizing child behavior [35].  
8  
9

10  
11 When the intervention is implemented, all patients receiving the intervention will be  
12  
13 asked to fill out an evaluation form after the final session, addressing user-satisfaction, parental  
14  
15 competence (PSOC) and Parental concern (PEDS). Patients experience with the interventions  
16  
17 will be analyzed in terms of user satisfaction. Furthermore, changes between pre- and post  
18  
19 measures on the PEDS and PSOC will be analyzed to evaluate the impact of the intervention in  
20  
21 terms of parental competence and parental concerns about their children.  
22  
23  
24  
25  
26

## 27 **Measures**

28  
29 The selection of questionnaires consists of several different assessment instruments for  
30  
31 the two different target groups.  
32  
33

### 34 **Process evaluation**

35  
36 *Questions about status quo in regular practice, changes in clinical practice one*  
37  
38 *year after implementation and at one-year follow-up.* Materials are based on the Keeping  
39  
40 Families and Children in Mind Online Resource – Evaluation, pre-training survey [36].  
41  
42 The questionnaire is adapted to the Norwegian context to assess the regular practice in  
43  
44 the organization regarding how it deals with children of mentally ill and substance  
45  
46 abusing parents before the implementation of new interventions, and changes in clinical  
47  
48 practice after implementing the new interventions. Examples of topics to be explored are  
49  
50 knowledge and attitudes about responsibilities for the children of patients, routines in the  
51  
52  
53  
54  
55  
56  
57  
58  
59  
60

1  
2  
3 organization, staff's practice, and the collaborative process between the services in the  
4  
5 municipalities and at UNN.  
6

7  
8 *Evaluating training and supervision of staff.* Every member of the staff who  
9  
10 participates in training and supervision related to the new interventions, will evaluate the  
11  
12 quality and quantity of training using a standardized questionnaire. These data will be used to  
13  
14 evaluate relationship between the quality of the training and whether the intervention was  
15  
16 delivered according to the protocol.  
17

18  
19  
20 *Evaluating the content of the logbook from Child Talks* [37]. Staff delivering the  
21  
22 intervention will report on the manualized issues covered in the sessions with parents/patients  
23  
24 and children, addressing who participated, concerns discussed, opportunities for support for the  
25  
26 family, and needs for further activities/interventions to support the family. These data will be  
27  
28 used to evaluate if the intervention was delivered according to the protocol.  
29

### 30 31 32 **Evaluation of the interventions impact on parents**

33  
34 *Family assessment questionnaire.* To identify children of mentally ill patients a  
35  
36 standardized questionnaire about the demographical variables about the patient and the child is  
37  
38 presented to patients who are parents. Information about the psychiatric history and diagnosis  
39  
40 of the patient is also collected in order to examine relationships between demographic and  
41  
42 patient variables and intervention user satisfaction.  
43

44  
45  
46 *Parents' Evaluations of Developmental Status (PEDS)* [32]. Parents' concerns will be  
47  
48 elicited via a short form of a standardized questionnaire called PEDS. Glascoe and her  
49  
50 colleagues demonstrated that most children with significant socio-emotional and behavior  
51  
52 problems are shown to have parents with concerns, and that parents' concerns are often as  
53  
54  
55  
56  
57  
58  
59  
60

1  
2  
3 accurate as quality screening of the children [34]. The PEDS will indicate the level of problems  
4  
5 in child development, and changes in development.  
6  
7

8 *Parents Sense of Competence (PSOC)* [33]. Parental competence will be elicited  
9  
10 via a standardized questionnaire called PSOC. Experiences of being a parent are related  
11  
12 to the developmental outcomes for children [38], and parents' experience of efficacy and  
13  
14 satisfaction in their role as a parent is evaluated to get information about these issues.  
15  
16 Two subscales measure efficacy (7 items,  $\alpha = 0.69$ ) and satisfaction (9 items,  $\alpha = 0.77$ ) in  
17  
18 parenting, and are computed by summing the scores within each scale.  
19  
20  
21

22 *Evaluating patient user satisfaction with the interventions.* Every patient who gives  
23  
24 their consent to participate in the Child Talk intervention will be asked to evaluate their  
25  
26 experience with the intervention and the broader services they have been offered, via a user  
27  
28 satisfaction questionnaire.  
29  
30  
31

### 32 33 34 **Intervention**

35  
36 The interventions to be implemented are a standardized *Family Assessment Form* and  
37  
38 the intervention called *Child Talks* developed and manualized in the Netherlands by Van  
39  
40 Doesum and Koster [37]. The family assessment form is an intervention to identify children of  
41  
42 mentally ill parents, and their needs. The intervention *Child Talks* is a health-promoting and  
43  
44 preventive intervention where the mental health workers talk with the family about the  
45  
46 situation of the children and their needs. This intervention is developed in the Netherlands [39],  
47  
48 and has been part of regular practice for two decades there. The intervention comes with a  
49  
50 manual that describes the process of carrying out three separate family conversations; one  
51  
52 initial conversation with the patient and possibly his/her partner, followed by two  
53  
54  
55  
56  
57  
58  
59  
60

1  
2  
3 conversations with the patient (and partner) and the children involved. The intervention allows  
4  
5 the parents/patients to describe their children's resources and vulnerability, and to participate in  
6  
7 planning how they want their child to be informed of the family situation. The intervention  
8  
9 includes the children through questions about their understanding and experiences of the  
10  
11 family situation, and the children's view of what may improve their situation. Adults for  
12  
13 children has translated and adapted the intervention for use in Norway, and has published a  
14  
15 pamphlet called "How do I help my child", which is used as a tool for staff, parents and  
16  
17 children in the conversations.  
18  
19  
20  
21

22 *Intervention integrity.* The professionals will follow the manual for the intervention,  
23  
24 and will complete standard check-lists (logbook) for each session to ensure this.  
25  
26  
27  
28

### 29 **Power analysis**

30  
31 Two separate power analyses were conducted, one for the Process evaluation part, and  
32  
33 one for the Evaluation of the intervention's impact on patients.  
34  
35

36 *Process evaluation:* In this case we based the power analysis on a t-test (paired samples)  
37  
38 of the pre-post change in clinical practice among the health care workers. The effect size  
39  
40 is expected to be small, but even a small change in clinical practice might be clinically  
41  
42 valuable for the families meeting the health care service. Expecting an effect size of  
43  
44 Cohen's  $d = 0.2$ , (two-tailed test and a significance level of .05), would result in a power  
45  
46 of 0.80 with a sample of 199 participants.  
47  
48  
49

50 *Evaluation of the interventions impact on patients who are parents:* Target variables for  
51  
52 the power analysis were Parental concern, and Parental efficacy and satisfaction.  
53  
54

55 A small to medium intervention effect from pre to post is expected for these variables,  
56  
57  
58  
59  
60

1  
2  
3 and we want to be able to detect an effect of  $d = 0.25$  with power = 0.80 (two-tailed test  
4  
5 and significance level of .05). In order to achieve this goal a sample of 128 participants is  
6  
7  
8 needed. Since a relatively large dropout from pre- to post test is expected, we aim to  
9  
10 recruit at least 200 patients for this part of the study.  
11

## 12 13 14 15 **Ethics**

16  
17  
18 The study is considered by the Regional Committees for Ethics in Medical Research.  
19  
20 Their view is that it is a quality evaluation project aimed at improving diagnostic and  
21  
22 therapeutic practices, and hence it is not applicable for the committee. The project is  
23  
24 approved by the data protection officer (DPO) who has approved of the total protocol for  
25  
26 this project  
27  
28  
29  
30

## 31 32 **Scientific and practical implications of the project**

33  
34 It is widely accepted that parenting behaviors influence the development of socio-  
35  
36 emotional and behavioral problems in children [40], and the quality of parenting a child receives is  
37  
38 considered to be the most potent but also the most modifiable risk factor contributing to the  
39  
40 development of behavioral and emotional problems in children [41]. Interventions to improve  
41  
42 parenting and the developmental path of children in families where one or both parents are  
43  
44 struggling with mental illness is much needed  
45  
46  
47

48  
49 The new Norwegian legislation regarding support for children of mentally ill parents  
50  
51 challenge all Norwegian psychiatric wards to change their practice related to patients who are  
52  
53 parents and their children. The mental health care service for adults is obligated to assess all  
54  
55 patients who are parents, and to act on their needs as parents. Results from this study will represent  
56  
57  
58  
59  
60

1  
2  
3 an important, new and much needed contribution to the mental health services for children with  
4  
5 mentally ill and/or substance abusing parents. Furthermore, the effects of the implementation of  
6  
7 the screening and the Child Talks intervention will be evaluated in terms of changes in personnel's  
8  
9 practice and collaboration between services, as well as patient's user satisfaction, parental  
10  
11 competence and parental concerns. Implementing the intervention Child Talks in the clinic may  
12  
13 lead to clear identification and more referrals of children in need of more extensive interventions,  
14  
15 and this study will lay the foundation for later evaluations of intervention effect for the children in  
16  
17 such families.  
18  
19  
20  
21  
22  
23

#### 24 **Author's contributions**

25 All authors participated in describing the design of this study. Reedt and Lauritzen obtained  
26  
27 funding for this study. All authors drafted this manuscript. All authors read and approved this  
28  
29 manuscript.  
30  
31  
32  
33  
34  
35

#### 36 **Competing interest**

37 The authors declare that they have no competing interests.  
38  
39  
40  
41  
42  
43  
44  
45  
46  
47

#### 48 **References**

- 49  
50  
51  
52  
53 1. Torvik., F.A. & Rognmo., K. (2011). Barn av foreldre med psykiske lidelser eller  
54  
55 alkoholmisbruk: Omfang og konsekvenser. Report 2011:4, The Norwegian  
56  
57  
58  
59  
60



- 1  
2  
3  
4  
5  
6  
7  
8  
9  
10  
11  
12  
13  
14  
15  
16  
17  
18  
19  
20  
21  
22  
23  
24  
25  
26  
27  
28  
29  
30  
31  
32  
33  
34  
35  
36  
37  
38  
39  
40  
41  
42  
43  
44  
45  
46  
47  
48  
49  
50  
51  
52  
53  
54  
55  
56  
57  
58  
59  
60
- Institute on Public Health, ISBN: 978-82-8082-461-5, retrieved from <http://www.fhi.no/dokumenter/Od04decc0b.pdf> on Monday the 3rd of October, 2011.
2. Beardslee, W. R., Versage, E. M., & Gladstone, T. R. G. (1998). Children of affectively ill parents: A review of the past 10 years. *Journal of the American Academy of Child and Adolescent Psychiatry*, 37, 1134-1141.
  3. Gladstone, B. M., Boydell, K. M., Seeman, M. V., & Mckeever, P. D. (2011). Children's experiences of parental mental illness: a literature review. *Early intervention in Psychiatry*, DOI: 10.1111/j.1751-7893.2011.00287.x
  4. Rutter, M., & Quinton, D. (1984). Parental Psychiatric Disorder: Effects on Children. *Psychological Medicine*, 14, 853-880.
  5. West, M. O., & Prinz, R. J. (1987). Parental alcoholism and childhood psychopathology. *Psychological Bulletin*, 102, 204-218.
  6. Beardslee, W. R., Versage, E. M., Velde, P. V. d., Swatling, S., & Hoke, L. (2002). The effects of parental dysfunction on children, in *Preventing depression in children through resiliency promotion: The Preventive Intervention Project*, (pp. 71-86). New York, NY: Kluwer Academic/Plenum Publishers; US.
  7. Goodman, S. H., & Gotlib, I. H. (2002). *Children of depressed parents: Mechanisms of risk and implications for treatment*. Washington, DC: American Psychological Association; US.
  8. Goodman, S. H., Rouse, M. H., Connell, A. M., Broth, M. R., Hall, C. M., & Heyward, D. (2011). Maternal depression and child psychopathology: A meta-analytic review. *Clinical Child and Family Psychology Review*, 14, 1-27.

- 1  
2  
3 9. Clark, D. B., Cornelius, J., Wood, D., & Vanyukov, M. (2004). Psychopathology  
4 risk transmission in children of parents with substance use disorders. *American*  
5  
6 *Journal of Psychiatry*, *161*, 685-691.  
7  
8
- 9  
10 10. Bauer, N. S., & Webster-Stratton, C. (2006). Prevention of behavioral disorders in  
11  
12 primary care. *Current Opinion in Pediatrics*, *18*, 654-660.  
13
- 14 11. Foster, E. M., Prinz, R. J., Sanders, M. R., & Shapiro, C. J. (2008). The costs of a  
15  
16 public health infrastructure for delivering parenting and family support. *Children and*  
17  
18 *Youth Services Review*, *30*, 493-501.  
19
- 20 12. Gardner, F., Sonuga-Barke, E. J. S., & Sayal, K. (1999). Parents Anticipating  
21  
22 Misbehaviour: An Observational Study of Strategies Parents Use to Prevent  
23  
24 Conflict with Behaviour Problem Children. *The Journal of Child Psychology and*  
25  
26 *Psychiatry and Allied Disciplines*, *40*, 1185-1196.  
27  
28
- 29 13. Granic, I., & Patterson, G. R. (2006). Toward a comprehensive model of  
30  
31 antisocial development: A dynamic systems approach. *Psychological Review*,  
32  
33 *113*, 101-131.  
34  
35
- 36 14. Murray, L., Sinclair, D., Cooper, P., Ducournau, P., & Turner, P. (1999). The  
37  
38 socioemotional development of 5-year-old children of postnatally depressed  
39  
40 mothers. *Journal of Child Psychology and Psychiatry*, *40*, 1259-1271.  
41  
42
- 43 15. Bifulco, A., Moran, P., Ball, C., Jacobs, C., Baines, R., Bunn, A., et al. (2002).  
44  
45 Childhood adversity, parental vulnerability and disorder: Examining inter-  
46  
47 generational transmission of risk. *Journal of Child Psychology and Psychiatry*,  
48  
49 *43*, 1075-1086.  
50  
51  
52  
53  
54  
55  
56  
57  
58  
59  
60

- 1  
2  
3  
4  
5  
6  
7  
8  
9  
10  
11  
12  
13  
14  
15  
16  
17  
18  
19  
20  
21  
22  
23  
24  
25  
26  
27  
28  
29  
30  
31  
32  
33  
34  
35  
36  
37  
38  
39  
40  
41  
42  
43  
44  
45  
46  
47  
48  
49  
50  
51  
52  
53  
54  
55  
56  
57  
58  
59  
60
16. Duggal, S., Carlson, E. A., Sroufe, L., & Egeland, B. (2001). Depressive symptomatology in childhood and adolescence. *Development and Psychopathology, 13*, 143-164.
  17. Elgar, F. J., Mills, R. S., McGrath, P. J., Waschbusch, D. A., & Brownridge, D. A. (2007). Maternal and paternal depressive symptoms and child maladjustment: The mediating role of parental behavior. *Journal of Abnormal Child Psychology: An official publication of the International Society for Research in Child and Adolescent Psychopathology, 35*, 943-955.
  18. Harnish, J. D., Dodge, K. A., & Valente, E. (1995). Mother-child interaction quality as a partial mediator of the roles of maternal depressive symptomatology and socioeconomic status in the development of child behavior problems. *Child Development, 66*, 739-753.
  19. Hosman, C. M. H., Van Doesum, K. T. M., & Van Santvoort, F. (2009). Prevention of emotional problems and psychiatric risks in children of parents with a mental illness in the Netherlands: I. The scientific basis to a comprehensive approach. *Australian e-Journal for the Advancement of Mental Health 8*, 250-263.
  20. Murray, L., Cooper, P., & Hipwell, A. (2003). Mental health of parents caring for infants. *Archives of Women's Mental Health, 6*, 71-77.
  21. Beardslee, W. R., Wright, E. J., Gladstone, T. R., & Forbes, P. (2007). Long-term effects from a randomized trial of two public health preventive interventions for parental depression. *Journal of Family Psychology, 21*, 703-713.

- 1  
2  
3  
4  
5  
6  
7  
8  
9  
10  
11  
12  
13  
14  
15  
16  
17  
18  
19  
20  
21  
22  
23  
24  
25  
26  
27  
28  
29  
30  
31  
32  
33  
34  
35  
36  
37  
38  
39  
40  
41  
42  
43  
44  
45  
46  
47  
48  
49  
50  
51  
52  
53  
54  
55  
56  
57  
58  
59  
60
22. Fraser, C., James, E. L., Anderson, K., Lloyd, D., & Judd, F. (2006). Intervention Programs for Children of Parents with a Mental Illness: A Critical Review. *The International Journal of Mental Health Promotion*, 8, 9-20.
23. Reupert, A., & Maybery, D. (2011). Programs for parents with a mental illness. *Journal of Psychiatric and Mental Health Nursing*, 18, 257-264.
24. van Doesum, K. T., Riksen-Walraven, J., Hosman, C. M., & Hoefnagels, C. (2008). A randomized controlled trial of a home-visiting intervention aimed at preventing relationship problems in depressed mothers and their infants. *Child Development*, 79, 547-561.
25. Sanders, M., Calam, R., Durand, M., Liversidge, T., & Carmont, S. A. (2008). Does self-directed and web-based support for parents enhance the effects of viewing a reality television series based on the triple P - Positive Parenting programme? *Journal of Child Psychology and Psychiatry*, 49, 924-932.
26. Aamodt, G., & Aamodt, I. (2005): Tiltak for barn med psykisk syke foreldre [Interventions for Children of Mentally Ill Parents]. Report. RBUP Øst/Sør.
27. Maybery, D., & Reupert, A. (2006). Workforce capacity to respond to children whose parents have a mental illness. *Australian and New Zealand Journal of Psychiatry*, 40, 657-664.
28. The Ministry of Health and Care Services. (2009). Changes in the law, downloaded from [http://www.regjeringen.no/pages/2188713/PDFS/OTP200820090084000DDDPD\\_FS.pdf](http://www.regjeringen.no/pages/2188713/PDFS/OTP200820090084000DDDPD_FS.pdf) on the 3rd of October, 2011.

- 1  
2  
3  
4  
5  
6  
7  
8  
9  
10  
11  
12  
13  
14  
15  
16  
17  
18  
19  
20  
21  
22  
23  
24  
25  
26  
27  
28  
29  
30  
31  
32  
33  
34  
35  
36  
37  
38  
39  
40  
41  
42  
43  
44  
45  
46  
47  
48  
49  
50  
51  
52  
53  
54  
55  
56  
57  
58  
59  
60
29. Fixsen, D. L., Naoom, S. F., Blasé, K. A., Friedman, R. M. & Wallace, F. (2005). *Implementation Research: A synthesis of the literature*. University of South Florida, Tampa. Downloaded from <http://cfs.cbcs.usf.edu/publications/detail.cfm?id=137> on the 20<sup>th</sup> of October, 2011.
30. Maybery, D., & Reupert, A. (2009). Parental mental illness: A review of barriers and issues for working with families and children. *Journal of Psychiatric and Mental Health Nursing*, 16(9), 784-791.
31. Ogden, T. (2010). *Familiebasert behandling av alvorlige atferdsproblemer blant barn og ungdom. Evaluering og implementering av evidensbaserte behandlingsprogrammer i Norge* [Family based treatment of ODD and CD among children and adolescents. Evaluation and implementation of evidence-based treatment programs in Norway]. Dissertation. University of Bergen, Norway. ISBN 978-82-308-1647-9.
32. Glascoe, F.P. (1997). Parents' concerns about children's development: Prescreening Technique or Screening Test? *Pediatrics*, 99, 522-528.
33. Johnston, C., & Mash, E. J. (1989). A measure of parenting satisfaction and efficacy. *Journal of Clinical Child Psychology*, 18, 167-175.
34. Glascoe, F. P. (2003). Parents' evaluation of developmental status: How well do parents' concerns identify children with behavioral and emotional problems? *Clinical Pediatrics*, 42, 133.

- 1  
2  
3  
4  
5  
6  
7  
8  
9  
10  
11  
12  
13  
14  
15  
16  
17  
18  
19  
20  
21  
22  
23  
24  
25  
26  
27  
28  
29  
30  
31  
32  
33  
34  
35  
36  
37  
38  
39  
40  
41  
42  
43  
44  
45  
46  
47  
48  
49  
50  
51  
52  
53  
54  
55  
56  
57  
58  
59  
60
35. Ohan, J. L., Leung, D. W., & Johnston, C. (2000). The Parenting Sense of Competence Scale: Evidence of a stable factor structure and validity. *Canadian Journal of Behavioural Science*, 32, 251-261.
36. Mayberry, Goodyear & Reupert. (2011). Keeping Families and Children in Mind Online Resource – Evaluation, pre-training survey. Downloaded from [http://www.copmi.net.au/worked/files/WFD\\_Res\\_Eval\\_POST\\_100210.pdf](http://www.copmi.net.au/worked/files/WFD_Res_Eval_POST_100210.pdf) on the 14th of October, 2011.
37. Van Doesum, K. T. M., & Koster, C. (2008). *KOPP Praten met ouders kinderen: Handleiding preventieve huisbezoeken voor ouders met psychiatrische problemen en hun kinderen (Manual Child Talks)*. Deventer, the Netherlands: Dimence, Community mental health center.
38. Reedtz, C., Handegard, B. H., & Morch, W.T. (2011). Promoting positive parenting practices in primary care: Outcomes and mechanisms of change in a randomized controlled risk reduction trial. *Scandinavian Journal of Psychology*, 52, 131-137.
39. Van Doesum, K. T. M., & Hosman, C. M. H. (2009). Prevention of emotional problems and psychiatric risks in children of parents with a mental illness in the Netherlands: II. Interventions. *Australian e-Journal for the Advancement of Mental Health*, 8, 264-267.
40. Hutchings, J., & Lane, E. (2005). Parenting and the development and prevention of child mental health problems. *Current Opinion in Psychiatry*, 18, 386-391.

1  
2  
3 41. Morawska, A., Winter, L., & Sanders, M. R. (2009). Parenting knowledge and its  
4  
5 role in the prediction of dysfunctional parenting and disruptive child behaviour.  
6  
7

8 *Child: Care, Health and Development*, 35, 217-226.  
9  
10  
11  
12  
13  
14  
15  
16  
17  
18  
19  
20  
21  
22  
23  
24  
25  
26  
27  
28  
29  
30  
31  
32  
33  
34  
35  
36  
37  
38  
39  
40  
41  
42  
43  
44  
45  
46  
47  
48  
49  
50  
51  
52  
53  
54  
55  
56  
57  
58  
59  
60



**Evaluating Workforce Developments to Support Children of Mentally Ill Parents: Implementing new interventions in the Adult Mental Health Care in Northern Norway.**

|                                 |                                                                                                                                                                                                                                                                                                                                           |
|---------------------------------|-------------------------------------------------------------------------------------------------------------------------------------------------------------------------------------------------------------------------------------------------------------------------------------------------------------------------------------------|
| Journal:                        | <i>BMJ Open</i>                                                                                                                                                                                                                                                                                                                           |
| Manuscript ID:                  | bmjopen-2011-000709.R1                                                                                                                                                                                                                                                                                                                    |
| Article Type:                   | Protocol                                                                                                                                                                                                                                                                                                                                  |
| Date Submitted by the Author:   | 21-Feb-2012                                                                                                                                                                                                                                                                                                                               |
| Complete List of Authors:       | Reedtz, Charlotte; University of Tromso, Regional Centre for Child and Youth Mental Health and Child Welfare<br>Lauritzen, Camilla; University of Tromso, Regional Centre for Child and Youth Mental Health and Child Welfare<br>Doesum, Karin; University of Tromso, Regional Centre for Child and Youth Mental Health and Child Welfare |
| <b>Primary Subject Heading</b>: | Health services research                                                                                                                                                                                                                                                                                                                  |
| Secondary Subject Heading:      | Mental health, Public health                                                                                                                                                                                                                                                                                                              |
| Keywords:                       | Quality in health care < HEALTH SERVICES ADMINISTRATION & MANAGEMENT, MENTAL HEALTH, Adult psychiatry < PSYCHIATRY, Child protection < PAEDIATRICS                                                                                                                                                                                        |
|                                 |                                                                                                                                                                                                                                                                                                                                           |

SCHOLARONE™  
Manuscripts

only



1  
2  
3  
4  
5  
6  
7  
8  
9  
10 Evaluating Workforce Developments to Support Children of Mentally Ill Parents: Implementing new  
11 interventions in the Adult Mental Health Care in Northern Norway.  
12

13  
14 Charlotte Reedtz<sup>1</sup>, Camilla Lauritzen<sup>1</sup> and Karin TM van Doesum<sup>1,2,3</sup>  
15

16 Universitetet i Tromsø,  
17  
18  
19  
20  
21  
22  
23

#### 24 **Author details**

25  
26  
27 <sup>1</sup> Regional centre for child and youth mental health and child welfare, Faculty of Health  
28 Sciences, University of Tromsø.  
29

30  
31 <sup>2</sup> Behavioural Science Institute, Radboud University Nijmegen, the Netherlands.  
32

33 <sup>3</sup> Dimence Community Mental Health centre, Deventer, The Netherlands.  
34  
35  
36  
37  
38

39 Correspondence concerning this article should be addressed to Charlotte Reedtz,  
40 Regional centre for child and youth mental health and child welfare, Faculty of Health  
41 Sciences, University of Tromsø, 9037 Tromsø, Norway. E-mail: charlotte.reedtz@uit.no  
42  
43  
44  
45  
46  
47  
48  
49  
50  
51  
52  
53  
54

## Abstract

**Background:** According to new Norwegian laws, mental health care for adults are obligated to assess all patients who are parents, and to act on their children's needs. This article describes the study protocol of implementing the interventions Family Assessment and Child Talks for children of patients in the adult psychiatry of the University Hospital of Northern Norway. The project is designed to evaluate the process of changes in clinical practice, as well as which impact the implemented interventions has on parental competence and parental concerns due to the implementation of two interventions. The interventions to be implemented are a standardized Family Assessment Form and the intervention called Child Talks. The family assessment form is an intervention to identify children of mentally ill parents, and their needs. The intervention Child Talks is a health-promoting and preventive intervention where the mental health workers talk with the family about the situation of the children and their needs.

**Methods/Design:** There are two groups of participants in this study; a) mental health workers in the clinic ( $N = 220$ ), and b) patients who are parents ( $N = 200$ ) receiving treatment in the clinic. a) In the evaluation of clinical practice, we will use a pre-test post-test one-year follow-up design. At pre-test we will evaluate status quo among mental health workers in the clinic regarding knowledge, attitudes, collaborative routines and clinical practice related to families with parental mental illness. After the pre-test is finished the project will move on to implement the interventions *Family Assessment Form* and *Child Talks* in the clinic. At post-test and one year follow-up we will evaluate the impact of implementing the *Family Assessment Form* in terms of how many children were identified and offered Child Talks in the clinic or referred to other services for additional support. b) In the evaluation of parents/patients experience with the interventions, we will use a pre-test post-test design. To

1  
2  
3  
4  
5  
6  
7  
8 identify children of mentally ill patients we collect data on demographical variables for the  
9 patient and the child at pre measures, as well as data on parental competence [\(PSOC\)](#) and  
10 parental concerns [\(PEDS\)](#) about their children. At post measures we evaluate the impact of the  
11 intervention in terms of user satisfaction, as well as changes between pre- and post measures  
12 on parental competence [\(PSOC\)](#) and parental concerns [\(PEDS\)](#) about their children.  
13  
14  
15

16  
17 **Discussion:** [The implication of implementing new interventions to safeguard children of](#)  
18 [mentally ill patients, and the limitation of not measuring child development directly is](#)  
19 [discussed. Results from this study will represent an important, new and much-needed](#)  
20 [contribution to the mental health services for children with mentally ill and/or substance](#)  
21 [abusing parents.](#)  
22  
23  
24  
25  
26  
27

## 28 29 30 Background

31 This article describes the study protocol of implementing the interventions Family  
32 Assessment and Child Talks for children of patients in the [General psychiatric clinic at](#)  
33 [psychiatry](#) of the University Hospital of Northern Norway (UNN).  
34  
35  
36

37 Children of parents with a mental illness (COPMI) are recognized as a large risk  
38 group. The Norwegian Institute of Public Health has estimated the number of children in  
39 this group, based on prevalence studies of how many of the entire adult population  
40 qualify for a diagnosis of mental disorder or alcohol abuse disorder [1]. They estimated  
41 that as much as 410 000 children in Norway (37.3%) had either one or two parents with a  
42 mental illness, ~~and 90 000 children (8.3%) had at least one alcohol abusing parent.~~ Many  
43 studies have indicated that children with mentally ill parents ~~or parents with substance~~  
44 ~~abuse disorder~~ are at risk of developing mental health problems themselves [2, 3, 4, 5].  
45  
46  
47  
48  
49  
50  
51  
52  
53  
54

1  
2  
3  
4  
5  
6  
7  
8 More than one third of these children develop serious and long-lasting problems. Early in  
9  
10 life, these children run a higher risk of abuse and neglect, depression, eating disorders,  
11  
12 conduct problems and academic failure. Later in life, they are at a higher risk of  
13  
14 depression, anxiety disorders, substance abuse, eating problems and personality disorders  
15  
16 [6, 7, 8, 1]. ~~A study by Clark and colleagues [9] among 6-14 year old children of parents~~  
17  
18 ~~with substance abuse disorder showed that these children have increased rates of conduct~~  
19  
20 ~~disorders, ADHD, and depressive and anxiety disorder.~~

21  
22 Though the preventive role of protective factors and resiliency in the socio-  
23  
24 emotional development of children has been studied extensively and are recognized in  
25  
26 developmental psychology, little research has been conducted to evaluate their role in the  
27  
28 transmission of parental psychopathology. However, research has documented that the  
29  
30 trans generational transmission of psychiatric risk is significantly mediated by the way  
31  
32 parents interact with their children and by lack of core parenting skills. Numerous studies  
33  
34 have revealed that dysfunctional family interaction, insensitive responsiveness, low  
35  
36 involvement with the child, low monitoring and hostility as well as child maltreatment,  
37  
38 may result from parental psychopathology [9, 10, 11, 12, 13]. It is especially when these  
39  
40 behavioural patterns are present during the early years of life that they trigger  
41  
42 dysregulated emotion patterns, negative emotionality, insecure attachment and decreased  
43  
44 perceived competence in children [13, 14, 15, 16, 17, 18, 19, 20].

45  
46 In order to develop preventive interventions for these children we have to focus  
47  
48 on the malleability of psychological and social risk and to improve protective factors, for  
49  
50 instance parenting behaviour, social support and coping skills. Internationally there are  
51  
52 already various examples of intervention programs available and there is now an  
53  
54

1  
2  
3  
4  
5  
6  
7  
8 expanding evidence base to demonstrate the effectiveness of a number of interventions  
9  
10 focused at children of mentally ill parents [e.g., [20](#), [21](#), [22](#), [23](#), [24](#)]. A number of  
11  
12 empirical articles published in the course of the past decade have emphasized that  
13  
14 parenting programs are among the most powerful and cost-effective interventions  
15  
16 available to prevent child maltreatment and socio-emotional and behavioral problems in  
17  
18 children [[10](#), [24](#)].  
19

20  
21 In spite of the fact that the risk factors for these children are known, there is a  
22  
23 consensus among professionals in the field and the Norwegian government that health  
24  
25 professionals have not yet been able to establish a change of practice so that children of  
26  
27 mentally ill parents are identified and offered preventive support and adequate help. A  
28  
29 Norwegian study has indicated that the services available to these children are  
30  
31 insufficient [[25](#)]. Furthermore, research on the outcomes of different interventions for  
32  
33 this group of children and youngsters is scarce. However, before researchers are in a  
34  
35 position to evaluate the different interventions to prevent the trans generational  
36  
37 transference of mental health problems, these interventions have to be put into wider use.  
38  
39 In order to conduct research to evaluate the health promoting and preventing effects of  
40  
41 interventions in the COPMI field, it is a prerequisite that relevant changes in clinical  
42  
43 practice to identify and offer children adequate support have been implemented. The  
44  
45 challenges with such an effort are threefold. Firstly, there is a lack of awareness in adult  
46  
47 mental health services that their clients may have children. Many wards have no routine  
48  
49 recording of whether or not the client has children. Secondly, adult mental health workers  
50  
51 are not educated to discuss parenting skills and to involve children in the treatment of the  
52  
53 patient. Thirdly, the funding of the health services is based on client contacts and the  
54  
55  
56  
57  
58  
59  
60

1  
2  
3  
4  
5  
6  
7  
8 children are not clients in the adult health care service. Children will only come to the  
9 attention of the health care system when they have already developed problems and need  
10 child mental health care [267]. The commission documents for the Norwegian regional  
11 public health care, state that children with mentally ill parents ~~or parents with substance~~  
12 ~~abuse disorder~~ are entitled to adequate help. Furthermore, several changes in relevant  
13 laws [278] have been made in order to meet these children's needs in the adult mental  
14 health care. One of the changes implied that all wards in the adult health care should have  
15 personnel responsible for the children (child contact persons) of the patients in the  
16 unit/ward. The new legislation became effective in January 2010. Therefore, important  
17 challenges in the Norwegian adult mental health service is to make sure that these  
18 children are identified, and that they get the support to which they are entitled.  
19

20  
21  
22  
23  
24  
25  
26  
27  
28  
29  
30 In order to meet the challenges related to patients who are parents and their  
31 children, and to meet the requirements of the law, it is crucial that new routines are  
32 established and new interventions utilized in the field of practice. The most efficient way  
33 for establishing new routines and interventions in an organization is by introducing and  
34 implementing interventions that are well described [289], even if the outcomes of the  
35 interventions might not yet be evaluated. In this particular project, RKBU North focuses  
36 attention on an intervention for children of mentally ill parents; Child Talks, which has  
37 been adopted for Norway by the organization Adults for Children. Child Talks involves  
38 2-3 sessions with parents and children and aims at supporting parents in their parenting  
39 role and thereby supporting the children. Experiences and outcomes of implementation  
40 processes have yet to be studied in a systematic way in Norway, and still little is known  
41  
42  
43  
44  
45  
46  
47  
48  
49  
50  
51  
52  
53  
54  
55  
56  
57  
58  
59  
60

1  
2  
3  
4  
5  
6  
7  
8 about the contextual factors that may promote or hinder the sustainability of the  
9  
10 implementation of new interventions [29, 30, 34].

11  
12 In brief, the current study aims to establish a change of practice in mental health care  
13  
14 services for adults through implementing a family focused assessment form and the  
15  
16 intervention Child Talks as a routine service in adult mental health care. The family focused  
17  
18 assessment form will be used as a tool to identify the children and families who are in need of  
19  
20 more support and help, and the intervention will provide support for the patients and their  
21  
22 children. Children's needs will be measured indirectly by assessing parental concerns and  
23  
24 parents' sense of competence. The rationale for this is twofold. Firstly, health professionals are  
25  
26 not required to assess children, as children are referred to other services in case of specific  
27  
28 needs. Secondly, researchers have demonstrated that most children with significant socio-  
29  
30 emotional and behavior problems are shown to have parents with concerns, and that parents'  
31  
32 concerns are often as accurate as quality screening [31]. Both the implementation process and  
33  
34 parent's experiences with the intervention will be assessed. This will be the first large scale  
35  
36 implementation study on this topic in Norway.

### 37 38 39 **Objective of the study and research questions**

40  
41 The project will evaluate the process of changes in clinical practice, as well as which  
42  
43 impact the implemented intervention has on parental competence and parental concerns.

### 44 45 46 **Research questions for the process evaluation of clinical practice:**

- 47  
48  
49 1. Will implementation of the Family Assessment Form lead to identification of children of  
50  
51 parents with mental illness?

2. Will implementation of the intervention *Child Talks* lead to changes among mental health workers in the clinic in terms of knowledge, attitudes, collaborative routines and clinical practice?
3. Is the intervention delivered according to the protocol?
4. ~~What do mental health workers in the clinic expect from the interventions, and do they believe it will be effective?~~

#### Research questions for the evaluation of the interventions impact on parents

1. ~~Are Which experiences do~~ patients who are parents ~~have satisfied~~ with the intervention *Child Talks* ~~in terms of user satisfaction~~?
2. Will the intervention *Child Talks* have an impact on patients who are parents in terms of parental competence?
3. Will the intervention *Child Talks* have an impact on patients who are parents in terms of and parental concerns?

### Methods

#### Participants

There are two main groups of participants in this study. The first group is mental health workers in the clinic ( $N = 220$ ), ranging from psychiatric nurses, psychologists, psychiatrists, social workers and different assistants. The second group of participants patients who are parents ( $N = 200$ ) receiving treatment in the clinic.

#### Recruitment



1  
2  
3  
4  
5  
6  
7  
8 The mental health workers in the clinic are recruited by the formal inclusion of the  
9 clinic in the research project. The management in the clinic has signed a contract for the  
10 collaboration with the research group, and all mental health workers are encouraged to answer  
11 the web-based questionnaires.  
12  
13  
14

15  
16 ~~Regarding the first intervention, parts of the~~ *Family Assessment Form* for  
17 patients/parents is mandatory for all mental health workers according to the law. The scales  
18 (PSOC and PEDS) are implemented in addition to this mandatory practice, but are included in  
19 the research project which the clinic has consented to participate in. that are made obligatory  
20 for all patients as part of the clinics quality assurance evaluation of clinical practice. Regarding  
21 the Parents receiving treatment in the clinic are recruited to receive the second intervention,  
22 *Child Talks*, ~~parents receiving treatment in the clinic are recruited to receive the intervention~~ by  
23 the mental health ~~worker who assess~~ worker who assesses the patient using the *Family*  
24 *Assessment Form*.  
25  
26  
27  
28  
29  
30  
31  
32  
33  
34  
35  
36

### 37 Procedure

38  
39 **Process evaluation.** This study will use a pre-test post-test with a one-year follow-up  
40 design. At pre-test we will evaluate status quo among mental health workers in the clinic  
41 regarding knowledge, attitudes, collaborative routines and clinical practice related to families  
42 with parental mental illness. The expectations of the mental health workers regarding the  
43 interventions will also be evaluated. This will be accomplished by web-based questionnaires  
44 for all staff.  
45  
46  
47  
48  
49  
50  
51  
52  
53  
54

1  
2  
3  
4  
5  
6  
7  
8  
9  
10  
11  
12  
13  
14  
15  
16  
17  
18  
19  
20  
21  
22  
23  
24  
25  
26  
27  
28  
29  
30  
31  
32  
33  
34  
35  
36  
37  
38  
39  
40  
41  
42  
43  
44  
45  
46  
47  
48  
49  
50  
51  
52  
53  
54  
55  
56  
57  
58  
59  
60

After the pre-test is finished the project will move on to implement the interventions *Family Assessment Form* and *Child Talks* in the clinic. The implementation starts with training mental health workers in the interventions. The organisation Adults for Children will be responsible for training and supervision of personnel in the clinic.

At post-test and one year follow-up we will evaluate the impact of implementing the *Family Assessment Form* in terms of how many children were identified and offered Child Talks in the clinic or referred to other services for additional support. This will be elicited by analyzing the content of *Family Assessment Form* for all patients in the clinic. The impact of the intervention *Child Talks* will be evaluated in terms of [actual](#) changes of clinical practice among mental health workers in the clinic, as well as expectations regarding the interventions. [Changes regarding health professionals' knowledge, attitude, collaborative routine and clinical practices will also be assessed by post-measures using](#) ~~This will be accomplished by~~ web-based questionnaires [to all staff](#). At one year follow-up we will evaluate if changes in clinical practice are sustained.

**Evaluation of the interventions impact on patients who are parents.** The design for this group is a pre-post design. Patients will complete the *Family Assessment Form* once they are admitted to treatment in the clinic. Questions about Parental concern (PEDS) [32] and parental competence (PSOC) [33] will be included in the *Family Assessment questionnaire Form* at pre-test. The rationale for including the two latter scales is that information from parents relatively correctly describes the emotional, social and behavioral development of their children. Researchers have demonstrated that most children with significant socio-emotional and behavior problems are shown to have parents with concerns, and that parents' concerns are

Formatted: Font: Italic

1  
2  
3  
4  
5  
6  
7  
8 often as accurate as quality screening [34]. Furthermore, parent satisfaction (i.e. parents'  
9 enjoyment of the parenting role) is negatively related to externalizing child behavior [35].

10  
11  
12 When the intervention is implemented, all patients receiving the intervention will be  
13 asked to fill out an evaluation form after the final session, addressing user-satisfaction, parental  
14 competence (PSOC) and Parental concern (PEDS). Patients experience with the interventions  
15 will be analyzed in terms of user satisfaction. Furthermore, changes between pre- and post  
16 measures on the PEDS and PSOC will be analyzed to evaluate the impact of the intervention in  
17 terms of parental competence and parental concerns about their children.  
18  
19  
20  
21

22  
23  
24 Health professionals register the contents of each *Child Talk* session with the family.

Formatted: Font: Italic

25  
26 Whether the intervention is delivered according to the protocol or not, is analyzed to assess  
27 intervention integrity as well as to qualify the relationship between dose and response for all  
28 participating families. This is vital to understand the variability of the impact on different  
29 families.  
30  
31  
32  
33  
34

### 35 Measures

36  
37 The selection of questionnaires consists of several different assessment instruments for  
38 the two different target groups.  
39

#### 40 Process evaluation

41  
42 *Questions about status quo in regular practice, changes in clinical practice one*  
43 *year after implementation and at one-year follow-up.* Materials are based on the Keeping  
44 Families and Children in Mind Online Resource – Evaluation, pre-training survey [36].  
45  
46

47 The questionnaire is adapted to the Norwegian context to assess the regular practice in  
48 the organization regarding how it deals with children of mentally ill ~~and substance~~  
49  
50  
51  
52  
53  
54

1  
2  
3  
4  
5  
6  
7  
8 | [abusing](#) parents before the implementation of new interventions, and changes in clinical  
9  
10 | practice after implementing the new interventions. Examples of topics to be explored are  
11  
12 | knowledge and attitudes about responsibilities for the children of patients, routines in the  
13  
14 | organization, staff's practice, and the collaborative process between the services in the  
15  
16 | municipalities and [at UNN in the hospital](#).

17  
18 | *Evaluating training and supervision of staff.* Every member of the staff who  
19  
20 | participates in training and supervision related to the new interventions, will evaluate the  
21  
22 | quality and quantity of training using a standardized questionnaire. These data will be used to  
23  
24 | evaluate relationship between the quality of the training and whether the intervention was  
25  
26 | delivered according to the protocol.

27  
28 | *Evaluating the content of the logbook from Child Talks* [37]. Staff delivering the  
29  
30 | intervention will report on the manualized issues covered in the sessions with parents/patients  
31  
32 | and children, addressing who participated, concerns discussed, opportunities for support for the  
33  
34 | family, and needs for further activities/interventions to support the family. These data will be  
35  
36 | used to evaluate if the intervention was delivered according to the protocol.

### 37 | **Evaluation of the interventions impact on parents**

38  
39 | *Family [Assessment Form](#)[questionnaire](#).* To identify children of mentally ill patients a  
40  
41 | standardized questionnaire about the demographical variables about the patient and the child is  
42  
43 | presented to patients who are parents. Information about [child age, gender, siblings, parental](#)  
44  
45 | [custody, others carers for the child, and which information the child has received about the](#)  
46  
47 | [situation with the parents collected. Furthermore, demographic data about the parents, the](#)  
48  
49 | psychiatric history and diagnosis of the patient is also collected in order to examine  
50  
51  
52  
53  
54

relationships between demographic [child](#) and patient variables and intervention user satisfaction.

*Parents' Evaluations of Developmental Status* (PEDS) [32]. Parents' concerns will be elicited via a short form of a standardized questionnaire called PEDS. Glascoe and her colleagues demonstrated that most children with significant socio-emotional and behavior problems are shown to have parents with concerns, and that parents' concerns are often as accurate as quality screening of the children [34]. The PEDS will indicate the level of problems in child development, and changes in development.

*Parents Sense of Competence* (PSOC) [33]. Parental competence will be elicited via a standardized questionnaire called PSOC. Experiences of being a parent are related to the developmental outcomes for children [38], and parents' experience of efficacy and satisfaction in their role as a parent is evaluated to get information about these issues. Two subscales measure efficacy (7 items,  $\alpha = 0.69$ ) and satisfaction (9 items,  $\alpha = 0.77$ ) in parenting, and are computed by summing the scores within each scale.

*Evaluating patient user satisfaction with the interventions.* Every patient who gives their consent to participate in the [Child Talks](#) intervention will be asked to evaluate their experience with the [interventions](#) ~~and the broader services they have been offered,~~ via a user satisfaction questionnaire. [There are 12 items exclusively related to satisfaction. An example is "The Child Talk intervention was useful to me as a parent", and all items was answered using a five point Likert scale ranging from 1 "I totally disagree" to 5 "I totally agree".](#)

## Intervention

1  
2  
3  
4  
5  
6  
7  
8 The interventions to be implemented are a standardized *Family Assessment Form* and  
9 the intervention called *Child Talks* developed and manualized in the Netherlands by Van  
10 Doesum and Koster [37]. The family assessment form is an intervention to identify children of  
11 mentally ill parents, and their needs. The intervention *Child Talks* is a health-promoting and  
12 preventive intervention where the mental health workers talk with the family about the  
13 situation of the children and their needs. This intervention is developed in the Netherlands [39],  
14 and has been part of regular practice for two decades there. The intervention comes with a  
15 manual that describes the process of carrying out three separate family conversations; one  
16 initial conversation with the patient and possibly his/her partner, followed by two  
17 conversations with the patient (and partner) and the children involved. The intervention allows  
18 the parents/patients to describe their children's resources and vulnerability, and to participate in  
19 planning how they want their child to be informed of the family situation. The intervention  
20 includes the children through questions about their understanding and experiences of the  
21 family situation, and the children's view of what may improve their situation. Adults for  
22 children has translated and adapted the intervention for use in Norway, and has published a  
23 pamphlet called "How do I help my child", which is used as a tool for staff, parents and  
24 children in the conversations.

25  
26  
27  
28  
29  
30  
31  
32  
33  
34  
35  
36  
37  
38  
39  
40  
41 *Intervention integrity.* The professionals will follow the manual for the intervention,  
42 and will complete standard check-lists (logbook) for each session to ensure this.

#### 43 44 45 46 **Power analysis**

47 Two separate power analyses were conducted, one for the Process evaluation part, and  
48 one for the Evaluation of the intervention's impact on patients.  
49  
50  
51  
52  
53  
54

1  
2  
3  
4  
5  
6  
7  
8 *Process evaluation:* In this case we based the power analysis on a t-test (paired samples)  
9  
10 of the pre-post change in clinical practice among the health care workers. The effect size  
11  
12 is expected to be small, but even a small change in clinical practice might be clinically  
13  
14 valuable for the families meeting the health care service. Expecting an effect size of  
15  
16 Cohen's  $d = 0.2$ , (two-tailed test and a significance level of .05), would result in a power  
17  
18 of 0.80 with a sample of 199 participants.

19  
20 *Evaluation of the interventions impact on patients who are parents:* Target variables for  
21  
22 the power analysis were Parental concern, and Parental efficacy and satisfaction.

23  
24 A small to medium intervention effect from pre to post is expected for these variables,  
25  
26 and we want to be able to detect an effect of  $d = 0.25$  with power = 0.80 (two-tailed test  
27  
28 and significance level of .05). In order to achieve this goal a sample of 128 participants is  
29  
30 needed. Since a relatively large dropout from pre- to post test is expected, we aim to  
31  
32 recruit at least 200 patients for this part of the study.

### 33 34 35 **Ethics**

36  
37  
38 The study is considered by the Regional Committees for Ethics in Medical Research.  
39  
40 Their view is that it is a quality evaluation project aimed at improving diagnostic and  
41  
42 therapeutic practices, and hence it is not applicable for the committee. The project is  
43  
44 approved by the data protection officer (DPO) who has approved of the total protocol for  
45  
46 this project

### 47 48 49 **Scientific and practical implications of the project**

1  
2  
3  
4  
5  
6  
7  
8  
9  
10  
11  
12  
13  
14  
15  
16  
17  
18  
19  
20  
21  
22  
23  
24  
25  
26  
27  
28  
29  
30  
31  
32  
33  
34  
35  
36  
37  
38  
39  
40  
41  
42  
43  
44  
45  
46  
47  
48  
49  
50  
51  
52  
53  
54  
55  
56  
57  
58  
59  
60

It is widely accepted that parenting behaviors influence the development of socio-emotional and behavioral problems in children [40], and the quality of parenting a child receives is considered to be the most potent but also the most modifiable risk factor contributing to the development of behavioral and emotional problems in children [41]. Interventions to improve parenting and the developmental path of children in families where one or both parents are struggling with mental illness ~~is~~ are much needed.

The new Norwegian legislation regarding support for children of mentally ill parents challenge all Norwegian psychiatric wards to change their practice related to patients who are parents and their children. The mental health care service for adults is obligated to assess all patients who are parents, and to act on their needs as parents. Results from this study will represent an important, new and much needed contribution to the mental health services for children with mentally ill ~~parents and/or substance abusing parents~~. Furthermore, the effects of the implementation of the ~~screening Family Assessment~~ and ~~the~~ Child Talks interventions will be evaluated in terms of changes in personnel's practice and collaboration between services, as well as patient's user satisfaction, parental competence and parental concerns. An important limitation is this study only examines child well-being based on parents' perceptions, excluding other informants. There is evidence to suggest a correlation between self-report measures of parents and that of observers [42]. These correlations are by no means perfect, but they do give us a certain degree of confidence in parents self-reports. Direct measures of child development and observations of parent-child interactions are needed to further increase the confidence in the results. However, implementing the intervention Child Talks in the clinic may lead to clear identification and more referrals of children in need of more extensive interventions, and this study will lay the foundation for later evaluations of intervention effect for the children in such families.

Formatted: English (U.S.)



### Acknowledgements

The study funded by the Norwegian Health Directorate and Regional centre for child and youth mental health and child welfare, Faculty of Health Sciences, University of Tromsø.

### Author's contributions

All authors participated in describing the design of this study. Reedtz and Lauritzen obtained funding for this study. All authors drafted this manuscript. All authors read and approved this manuscript.

### Competing interest

The authors declare that they have no competing interests.

### References

1. Torvik, F.A. & Rognmo., K. (2011). Barn av foreldre med psykiske lidelser eller alkoholmisbruk: Omfang og konsekvenser. Report 2011:4, The Norwegian Institute on Public Health, ISBN: 978-82-8082-461-5, retrieved from <http://www.fhi.no/dokumenter/0d04decc0b.pdf> on Monday the 3rd of October, 2011.
2. Beardslee, W. R., Versage, E. M., & Gladstone, T. R. G. (1998). Children of affectively ill parents: A review of the past 10 years. *Journal of the American Academy of Child and Adolescent Psychiatry*, 37, 1134-1141.

- 1  
2  
3  
4  
5  
6  
7  
8  
9  
10  
11  
12  
13  
14  
15  
16  
17  
18  
19  
20  
21  
22  
23  
24  
25  
26  
27  
28  
29  
30  
31  
32  
33  
34  
35  
36  
37  
38  
39  
40  
41  
42  
43  
44  
45  
46  
47  
48  
49  
50  
51  
52  
53  
54  
55  
56  
57  
58  
59  
60
3. Gladstone, B. M., Boydell, K. M., Seeman, M. V., & Mckeever, P. D. (2011). Children's experiences of parental mental illness: a literature review. *Early intervention in Psychiatry*, DOI: 10.1111/j.1751-7893.2011.00287.x
  4. Rutter, M., & Quinton, D. (1984). Parental Psychiatric Disorder: Effects on Children. *Psychological Medicine*, 14, 853-880.
  5. West, M. O., & Prinz, R. J. (1987). Parental alcoholism and childhood psychopathology. *Psychological Bulletin*, 102, 204-218.
  6. Beardslee, W. R., Versage, E. M., Velde, P. V. d., Swatling, S., & Hoke, L. (2002). The effects of parental dysfunction on children, in *Preventing depression in children through resiliency promotion: The Preventive Intervention Project*, (pp. 71-86). New York, NY: Kluwer Academic/Plenum Publishers; US.
  7. Goodman, S. H., & Gotlib, I. H. (2002). *Children of depressed parents: Mechanisms of risk and implications for treatment*. Washington, DC: American Psychological Association; US.
  8. Goodman, S. H., Rouse, M. H., Connell, A. M., Broth, M. R., Hall, C. M., & Heyward, D. (2011). Maternal depression and child psychopathology: A meta-analytic review. *Clinical Child and Family Psychology Review*, 14, 1-27.
  9. ~~Clark, D. B., Cornelius, J., Wood, D., & Vanyukov, M. (2004). Psychopathology risk transmission in children of parents with substance use disorders. *American Journal of Psychiatry*, 161, 685-691.~~
  10. ~~9.~~ Bauer, N. S., & Webster-Stratton, C. (2006). Prevention of behavioral disorders in primary care. *Current Opinion in Pediatrics*, 18, 654-660.

- 1  
2  
3  
4  
5  
6  
7  
8  
9  
10  
11  
12  
13  
14  
15  
16  
17  
18  
19  
20  
21  
22  
23  
24  
25  
26  
27  
28  
29  
30  
31  
32  
33  
34  
35  
36  
37  
38  
39  
40  
41  
42  
43  
44  
45  
46  
47  
48  
49  
50  
51  
52  
53  
54  
55  
56  
57  
58  
59  
60
10. Foster, E. M., Prinz, R. J., Sanders, M. R., & Shapiro, C. J. (2008). The costs of a public health infrastructure for delivering parenting and family support. *Children and Youth Services Review*, *30*, 493-501.
11. Gardner, F., Sonuga-Barke, E. J. S., & Sayal, K. (1999). Parents Anticipating Misbehaviour: An Observational Study of Strategies Parents Use to Prevent Conflict with Behaviour Problem Children. *The Journal of Child Psychology and Psychiatry and Allied Disciplines*, *40*, 1185-1196.
12. Granic, I., & Patterson, G. R. (2006). Toward a comprehensive model of antisocial development: A dynamic systems approach. *Psychological Review*, *113*, 101-131.
13. Murray, L., Sinclair, D., Cooper, P., Ducournau, P., & Turner, P. (1999). The socioemotional development of 5-year-old children of postnatally depressed mothers. *Journal of Child Psychology and Psychiatry*, *40*, 1259-1271.
14. Bifulco, A., Moran, P., Ball, C., Jacobs, C., Baines, R., Bunn, A., et al. (2002). Childhood adversity, parental vulnerability and disorder: Examining inter-generational transmission of risk. *Journal of Child Psychology and Psychiatry*, *43*, 1075-1086.
15. Duggal, S., Carlson, E. A., Sroufe, L., & Egeland, B. (2001). Depressive symptomatology in childhood and adolescence. *Development and Psychopathology*, *13*, 143-164.
16. Elgar, F. J., Mills, R. S., McGrath, P. J., Waschbusch, D. A., & Brownridge, D. A. (2007). Maternal and paternal depressive symptoms and child maladjustment: The mediating role of parental behavior. *Journal of Abnormal Child Psychology*:

1  
2  
3  
4  
5  
6  
7  
8  
9  
10  
11  
12  
13  
14  
15  
16  
17  
18  
19  
20  
21  
22  
23  
24  
25  
26  
27  
28  
29  
30  
31  
32  
33  
34  
35  
36  
37  
38  
39  
40  
41  
42  
43  
44  
45  
46  
47  
48  
49  
50  
51  
52  
53  
54  
55  
56  
57  
58  
59  
60

*An official publication of the International Society for Research in Child and Adolescent Psychopathology, 35, 943-955.*

17. Harnish, J. D., Dodge, K. A., & Valente, E. (1995). Mother-child interaction quality as a partial mediator of the roles of maternal depressive symptomatology and socioeconomic status in the development of child behavior problems. *Child Development, 66, 739-753.*
18. Hosman, C. M. H., Van Doesum, K. T. M., & Van Santvoort, F. (2009). Prevention of emotional problems and psychiatric risks in children of parents with a mental illness in the Netherlands: I. The scientific basis to a comprehensive approach. *Australian e-Journal for the Advancement of Mental Health 8, 250-263.*
19. Murray, L., Cooper, P., & Hipwell, A. (2003). Mental health of parents caring for infants. *Archives of Women's Mental Health, 6, 71-77.*
20. Beardslee, W. R., Wright, E. J., Gladstone, T. R., & Forbes, P. (2007). Long-term effects from a randomized trial of two public health preventive interventions for parental depression. *Journal of Family Psychology, 21, 703-713.*
21. Fraser, C., James, E. L., Anderson, K., Lloyd, D., & Judd, F. (2006). Intervention Programs for Children of Parents with a Mental Illness: A Critical Review. *The International Journal of Mental Health Promotion, 8, 9-20.*
22. Reupert, A., & Maybery, D. (2011). Programs for parents with a mental illness. *Journal of Psychiatric and Mental Health Nursing, 18, 257-264.*
23. van Doesum, K. T., Riksen-Walraven, J., Hosman, C. M., & Hoefnagels, C. (2008). A randomized controlled trial of a home-visiting intervention aimed at

- 1  
2  
3  
4  
5  
6  
7  
8 preventing relationship problems in depressed mothers and their infants. *Child*  
9 *Development*, 79, 547-561.
- 10  
11  
12 24. Sanders, M., Calam, R., Durand, M., Liversidge, T., & Carmont, S. A. (2008).  
13 Does self-directed and web-based support for parents enhance the effects of  
14 viewing a reality television series based on the triple P - Positive Parenting  
15 programme? *Journal of Child Psychology and Psychiatry*, 49, 924-932.
- 16  
17  
18 25. Aamodt, G., & Aamodt, I. (2005): Tiltak for barn med psykisk syke foreldre  
19 [Interventions for Children of Mentally Ill Parents]. Report. RBUP Øst/Sør.
- 20  
21  
22 26. Maybery, D., & Reupert, A. (2006). Workforce capacity to respond to children  
23 whose parents have a mental illness. *Australian and New Zealand Journal of*  
24 *Psychiatry*, 40, 657-664.
- 25  
26  
27 27. The Ministry of Health and Care Services. (2009). Changes in the law,  
28 downloaded from  
29 <http://www.regjeringen.no/pages/2188713/PDFS/OTP200820090084000DDDDPD>  
30 [FS.pdf](#) on the 3rd of October, 2011.
- 31  
32  
33 28. Fixsen, D. L., Naoom, S. F., Blasé, K. A., Friedman, R. M. & Wallace, F. (2005).  
34 *Implementation Research: A synthesis of the literature*. University of South  
35 Florida, Tampa. Downloaded from  
36 <http://cfs.cbcs.usf.edu/publications/detail.cfm?id=137> on the 20<sup>th</sup> of October,  
37 2011.
- 38  
39  
40 29. Maybery, D., & Reupert, A. (2009). Parental mental illness: A review of barriers  
41 and issues for working with families and children. *Journal of Psychiatric and*  
42 *Mental Health Nursing*, 16(9), 784-791.
- 43  
44  
45  
46  
47  
48  
49  
50  
51  
52  
53  
54  
55  
56  
57  
58  
59  
60

1  
2  
3  
4  
5  
6  
7  
8  
9  
10  
11  
12  
13  
14  
15  
16  
17  
18  
19  
20  
21  
22  
23  
24  
25  
26  
27  
28  
29  
30  
31  
32  
33  
34  
35  
36  
37  
38  
39  
40  
41  
42  
43  
44  
45  
46  
47  
48  
49  
50  
51  
52  
53  
54  
55  
56  
57  
58  
59  
60

30. Ogden, T. (2010). *Familiebasert behandling av alvorlige atferdsproblemer blant barn og ungdom. Evaluering og implementering av evidensbaserte behandlingsprogrammer i Norge* [Family based treatment of ODD and CD among children and adolescents. Evaluation and implementation of evidence-based treatment programs in Norway]. Dissertation. University of Bergen, Norway. ISBN 978-82-308-1647-9.

31. Glascoe, F. P. (2003). [Parents' evaluation of developmental status: How well do parents' concerns identify children with behavioral and emotional problems?](#) *Clinical Pediatrics*, 42, 133-138.

30.32. Glascoe, F.P. (1997). Parents' concerns about children's development: Prescreening Technique or Screening Test? *Pediatrics*, 99, 522-528.

31.33. Johnston, C., & Mash, E. J. (1989). A measure of parenting satisfaction and efficacy. *Journal of Clinical Child Psychology*, 18, 167-175.

32.34. Glascoe, F. P. (2003). Parents' evaluation of developmental status: How well do parents' concerns identify children with behavioral and emotional problems? *Clinical Pediatrics*, 42, 133.

33.35. Ohan, J. L., Leung, D. W., & Johnston, C. (2000). The Parenting Sense of Competence Scale: Evidence of a stable factor structure and validity. *Canadian Journal of Behavioural Science*, 32, 251-261.

34.36. Mayberry, Goodyear & Reupert. (2011). Keeping Families and Children in Mind Online Resource – Evaluation, pre-training survey. Downloaded from

1  
2  
3  
4  
5  
6  
7  
8 [http://www.copmi.net.au/worked/files/WFD\\_Res\\_Eval\\_POST\\_100210.pdf](http://www.copmi.net.au/worked/files/WFD_Res_Eval_POST_100210.pdf) on  
9  
10 the 14th of October, 2011.

11  
12 | ~~35~~37. Van Doesum, K. T. M., & Koster, C. (2008). *KOPP Praten met ouders*  
13 *kinderen: Handleiding preventieve huisbezoeken voor ouders met psychiatrische*  
14 *problemen en hun kinderen (Manual Child Talks)*. Deventer, the Netherlands:  
15 Dimence, Community mental health center.

16  
17 | ~~36~~38. Reedtz, C., Handegard, B. H., & Morch, W.T. (2011). Promoting positive  
18 parenting practices in primary care: Outcomes and mechanisms of change in a  
19 randomized controlled risk reduction trial. *Scandinavian Journal of Psychology*,  
20 52, 131-137.

21  
22 | ~~37~~39. Van Doesum, K. T. M., & Hosman, C. M. H. (2009). Prevention of  
23 emotional problems and psychiatric risks in children of parents with a mental  
24 illness in the Netherlands: II. Interventions. *Australian e-Journal for the*  
25 *Advancement of Mental Health*, 8, 264-267.

26  
27 | ~~38~~40. Hutchings, J., & Lane, E. (2005). Parenting and the development and  
28 prevention of child mental health problems. *Current Opinion in Psychiatry*, 18,  
29 386-391.

30  
31 | ~~41~~41. Morawska, A., Winter, L., & Sanders, M. R. (2009). Parenting knowledge and its  
32 role in the prediction of dysfunctional parenting and disruptive child behaviour.  
33 *Child: Care, Health and Development*, 35, 217-226.

34  
35 | ~~39~~42. [Zubrick, S. R., Ward, K. A., Silburn, S. R., Lawrence, D., Williams, A. A.,](#)  
36  
37  
38  
39  
40  
41  
42  
43  
44  
45  
46  
47  
48  
49  
50  
51  
52  
53  
54  
55  
56  
57  
58  
59  
60  
[Blair, E., et al. \(2005\). Prevention of child behavior problems through universal](#)

Formatted: English (U.S.)

Formatted: Level 1, Adjust space between Latin and Asian text, Adjust space between Asian text and numbers

1  
2  
3  
4  
5  
6  
7  
8  
9  
10  
11  
12  
13  
14  
15  
16  
17  
18  
19  
20  
21  
22  
23  
24  
25  
26  
27  
28  
29  
30  
31  
32  
33  
34  
35  
36  
37  
38  
39  
40  
41  
42  
43  
44  
45  
46  
47  
48  
49  
50  
51  
52  
53  
54  
55  
56  
57  
58  
59  
60

[implementation of a group behavioral family intervention. \*Prevention Science\*, 6, 287-304.](#)

Formatted: Norwegian (Bokmål)

For peer review only





**Evaluating Workforce Developments to Support Children of Mentally Ill Parents: Implementing new interventions in the Adult Mental Health Care in Northern Norway.**

|                                 |                                                                                                                                                                                                                                                                                                                                           |
|---------------------------------|-------------------------------------------------------------------------------------------------------------------------------------------------------------------------------------------------------------------------------------------------------------------------------------------------------------------------------------------|
| Journal:                        | <i>BMJ Open</i>                                                                                                                                                                                                                                                                                                                           |
| Manuscript ID:                  | bmjopen-2011-000709.R2                                                                                                                                                                                                                                                                                                                    |
| Article Type:                   | Protocol                                                                                                                                                                                                                                                                                                                                  |
| Date Submitted by the Author:   | 13-Mar-2012                                                                                                                                                                                                                                                                                                                               |
| Complete List of Authors:       | Reedtz, Charlotte; University of Tromso, Regional Centre for Child and Youth Mental Health and Child Welfare<br>Lauritzen, Camilla; University of Tromso, Regional Centre for Child and Youth Mental Health and Child Welfare<br>Doesum, Karin; University of Tromso, Regional Centre for Child and Youth Mental Health and Child Welfare |
| <b>Primary Subject Heading</b>: | Health services research                                                                                                                                                                                                                                                                                                                  |
| Secondary Subject Heading:      | Mental health, Public health                                                                                                                                                                                                                                                                                                              |
| Keywords:                       | Quality in health care < HEALTH SERVICES ADMINISTRATION & MANAGEMENT, MENTAL HEALTH, Adult psychiatry < PSYCHIATRY, Child protection < PAEDIATRICS                                                                                                                                                                                        |
|                                 |                                                                                                                                                                                                                                                                                                                                           |

SCHOLARONE™  
Manuscripts

Only

1  
2  
3  
4  
5  
6  
7  
8  
9  
10 Evaluating Workforce Developments to Support Children of Mentally Ill Parents: Implementing new  
11 interventions in the Adult Mental Health Care in Northern Norway.

12  
13  
14 Charlotte Reedtz<sup>1</sup>, Camilla Lauritzen<sup>1</sup> and Karin TM van Doesum<sup>1,2,3</sup>

15  
16 Universitetet i Tromsø,

17  
18  
19  
20  
21  
22  
23  
24 **Author details**

25  
26  
27 <sup>1</sup> Regional centre for child and youth mental health and child welfare, Faculty of Health  
28 Sciences, University of Tromsø.

29  
30  
31 <sup>2</sup> Behavioural Science Institute, Radboud University Nijmegen, the Netherlands.

32  
33 <sup>3</sup> Dimence Community Mental Health centre, Deventer, The Netherlands.

34  
35  
36  
37  
38  
39 Correspondence concerning this article should be addressed to Charlotte Reedtz,  
40 Regional centre for child and youth mental health and child welfare, Faculty of Health  
41 Sciences, University of Tromsø, 9037 Tromsø, Norway. E-mail: charlotte.reedtz@uit.no  
42  
43  
44  
45  
46  
47  
48  
49  
50  
51  
52  
53  
54

## Abstract

**Background:** According to new Norwegian laws, mental health care for adults are obligated to assess all patients who are parents, and to act on their children's needs. This article describes the study protocol of implementing the interventions Family Assessment and Child Talks for children of patients in the adult psychiatry of the University Hospital of Northern Norway. The project is designed to evaluate the process of changes in clinical practice, due to the implementation of two interventions. The interventions to be implemented are a standardized *Family Assessment Form* and the intervention called *Child Talks*. The family assessment form is an intervention to identify children of mentally ill parents, and their needs. The intervention *Child Talks* is a health-promoting and preventive intervention where the mental health workers talk with the family about the situation of the children and their needs. **Methods/Design:** There are two groups of participants in this study; a) mental health workers in the clinic ( $N = 220$ ), and b) patients who are parents ( $N = 200$ ) receiving treatment in the clinic. a) In the evaluation of clinical practice, we will use a pre-test post-test one-year follow-up design. At pre-test we will evaluate status quo among mental health workers in the clinic regarding knowledge, attitudes, collaborative routines and clinical practice related to families with parental mental illness. After the pre-test is finished the project will move on to implement the interventions *Family Assessment Form* and *Child Talks* in the clinic. At post-test and one year follow-up we will evaluate the impact of implementing the *Family Assessment Form* in terms of how many children were identified and offered Child Talks in the clinic or referred to other services for additional support. b) In the evaluation of parents/patients experience with the interventions, we will use a pre-test post-test design. To identify children of mentally ill patients we collect data on demographical variables for the patient and the child at pre measures, as well as data

1  
2  
3  
4  
5  
6  
7  
8 on parental competence (PSOC) and parental concerns (PEDS) about their children. At post  
9  
10 measures we evaluate the impact of the intervention in terms of user satisfaction, as well as  
11  
12 changes between pre- and post measures on parental competence (PSOC) and parental  
13  
14 concerns (PEDS) about their children. **Discussion:** The implication of implementing new  
15  
16 interventions to safeguard children of mentally ill patients, and the limitation of not measuring  
17  
18 child development directly is discussed.  
19

## 20 21 22 Background

23  
24 This article describes the study protocol of implementing the interventions Family  
25  
26 Assessment and Child Talks for children of patients in the General psychiatric clinic of  
27  
28 the University Hospital of Northern Norway (UNN).

29  
30 Children of parents with a mental illness (COPMI) are recognized as a large risk  
31  
32 group. The Norwegian Institute of Public Health has estimated the number of children in  
33  
34 this group, based on prevalence studies of how many of the entire adult population  
35  
36 qualify for a diagnosis of mental disorder or alcohol abuse disorder [1]. They estimated  
37  
38 that as much as 410 000 children in Norway (37.3%) had either one or two parents with a  
39  
40 mental illness. Many studies have indicated that children with mentally ill parents are at  
41  
42 risk of developing mental health problems themselves [2, 3, 4, 5]. More than one third of  
43  
44 these children develop serious and long-lasting problems. Early in life, these children run  
45  
46 a higher risk of abuse and neglect, depression, eating disorders, conduct problems and  
47  
48 academic failure. Later in life, they are at a higher risk of depression, anxiety disorders,  
49  
50 substance abuse, eating problems and personality disorders [6, 7, 8, 1].  
51  
52  
53  
54  
55  
56  
57  
58  
59  
60

1  
2  
3  
4  
5  
6  
7  
8  
9  
10  
11  
12  
13  
14  
15  
16  
17  
18  
19  
20  
21  
22  
23  
24  
25  
26  
27  
28  
29  
30  
31  
32  
33  
34  
35  
36  
37  
38  
39  
40  
41  
42  
43  
44  
45  
46  
47  
48  
49  
50  
51  
52  
53  
54  
55  
56  
57  
58  
59  
60

Though the preventive role of protective factors and resiliency in the socio-emotional development of children has been studied extensively and are recognized in developmental psychology, little research has been conducted to evaluate their role in the transmission of parental psychopathology. However, research has documented that the trans generational transmission of psychiatric risk is significantly mediated by the way parents interact with their children and by lack of core parenting skills. Numerous studies have revealed that dysfunctional family interaction, insensitive responsiveness, low involvement with the child, low monitoring and hostility as well as child maltreatment, may result from parental psychopathology [9, 10, 11, 12]. It is especially when these behavioural patterns are present during the early years of life that they trigger dysregulated emotion patterns, negative emotionality, insecure attachment and decreased perceived competence in children [13, 14, 15, 16, 17, 18, 19].

In order to develop preventive interventions for these children we have to focus on the malleability of psychological and social risk and to improve protective factors, for instance parenting behaviour, social support and coping skills. Internationally there are already various examples of intervention programs available and there is now an expanding evidence base to demonstrate the effectiveness of a number of interventions focused at children of mentally ill parents [e.g., 20, 21, 22, 23]. A number of empirical articles published in the course of the past decade have emphasized that parenting programs are among the most powerful and cost-effective interventions available to prevent child maltreatment and socio-emotional and behavioral problems in children [10, 24].

1  
2  
3  
4  
5  
6  
7  
8  
9  
10  
11  
12  
13  
14  
15  
16  
17  
18  
19  
20  
21  
22  
23  
24  
25  
26  
27  
28  
29  
30  
31  
32  
33  
34  
35  
36  
37  
38  
39  
40  
41  
42  
43  
44  
45  
46  
47  
48  
49  
50  
51  
52  
53  
54  
55  
56  
57  
58  
59  
60

In spite of the fact that the risk factors for these children are known, there is a consensus among professionals in the field and the Norwegian government that health professionals have not yet been able to establish a change of practice so that children of mentally ill parents are identified and offered preventive support and adequate help. A Norwegian study has indicated that the services available to these children are insufficient [25]. Furthermore, research on the outcomes of different interventions for this group of children and youngsters is scarce. However, before researchers are in a position to evaluate the different interventions to prevent the trans generational transference of mental health problems, these interventions have to be put into wider use. In order to conduct research to evaluate the health promoting and preventing effects of interventions in the COPMI field, it is a prerequisite that relevant changes in clinical practice to identify and offer children adequate support have been implemented. The challenges with such an effort are threefold. Firstly, there is a lack of awareness in adult mental health services that their clients may have children. Many wards have no routine recording of whether or not the client has children. Secondly, adult mental health workers are not educated to discuss parenting skills and to involve children in the treatment of the patient. Thirdly, the funding of the health services is based on client contacts and the children are not clients in the adult health care service. Children will only come to the attention of the health care system when they have already developed problems and need child mental health care [26]. The commission documents for the Norwegian regional public health care, state that children with mentally ill parents are entitled to adequate help. Furthermore, several changes in relevant laws [27] have been made in order to meet these children's needs in the adult mental health care. One of the changes implied that all wards

1  
2  
3  
4  
5  
6  
7  
8  
9  
10  
11  
12  
13  
14  
15  
16  
17  
18  
19  
20  
21  
22  
23  
24  
25  
26  
27  
28  
29  
30  
31  
32  
33  
34  
35  
36  
37  
38  
39  
40  
41  
42  
43  
44  
45  
46  
47  
48  
49  
50  
51  
52  
53  
54  
55  
56  
57  
58  
59  
60

in the adult health care should have personnel responsible for the children (child contact persons) of the patients in the unit/ward. The new legislation became effective in January 2010. Therefore, important challenges in the Norwegian adult mental health service is to make sure that these children are identified, and that they get the support to which they are entitled.

In order to meet the challenges related to patients who are parents and their children, and to meet the requirements of the law, it is crucial that new routines are established and new interventions utilized in the field of practice. The most efficient way for establishing new routines and interventions in an organization is by introducing and implementing interventions that are well described [28], even if the outcomes of the interventions might not yet be evaluated. In this particular project, RKBU North focuses attention on an intervention for children of mentally ill parents; Child Talks, which has been adopted for Norway by the organization Adults for Children. Child Talks involves 2-3 sessions with parents and children and aims at supporting parents in their parenting role and thereby supporting the children. Experiences and outcomes of implementation processes have yet to be studied in a systematic way in Norway, and still little is known about the contextual factors that may promote or hinder the sustainability of the implementation of new interventions [29, 30].

In brief, the current study aims to establish a change of practice in mental health care services for adults through implementing a family focused assessment form and the intervention Child Talks as a routine service in adult mental health care. The family focused assessment form will be used as a tool to identify the children and families who are in need of more support and help, and the intervention will provide support for the patients and their

1  
2  
3  
4  
5  
6  
7  
8 children. Children's needs will be measured indirectly by assessing parental concerns and  
9  
10 parents' sense of competence. [Children in need of support or treatment themselves, will be](#)  
11 [referred to other services in collaboration with the parent/patient.](#) The rationale for this is  
12  
13  
14 twofold. Firstly, health professionals are not required to assess children, as children are  
15  
16 referred to other services in case of specific needs. Secondly, researchers have demonstrated  
17  
18 that most children with significant socio-emotional and behavior problems are shown to have  
19  
20 parents with concerns, and that parents' concerns are often as accurate as quality screening  
21  
22 [31]. Both the implementation process and parent's experiences with the intervention will be  
23  
24 assessed. This will be the first large scale implementation study on this topic in Norway.  
25  
26  
27

### 28 **Objective of the study and research questions**

29  
30 The project will evaluate the process of changes in clinical practice, as well as which  
31  
32 impact the implemented intervention has on parental competence and parental concerns.  
33  
34

### 35 **Research questions for the process evaluation of clinical practice:**

- 36  
37 1. Will implementation of the Family Assessment Form lead to identification of children of  
38  
39 parents with mental illness?  
40
- 41  
42 2. Will implementation of the intervention *Child Talks* lead to changes among mental health  
43  
44 workers in the clinic in terms of knowledge, attitudes, collaborative routines and clinical  
45  
46 practice?  
47
- 48  
49 3. Is the intervention delivered according to the protocol?  
50

### 51 **Research questions for the evaluation of the interventions impact on parents**



- 1
  - 2
  - 3
  - 4
  - 5
  - 6
  - 7
  - 8
  - 9
  - 10
  - 11
  - 12
  - 13
  - 14
  - 15
  - 16
  - 17
  - 18
  - 19
  - 20
  - 21
  - 22
  - 23
  - 24
  - 25
  - 26
  - 27
  - 28
  - 29
  - 30
  - 31
  - 32
  - 33
  - 34
  - 35
  - 36
  - 37
  - 38
  - 39
  - 40
  - 41
  - 42
  - 43
  - 44
  - 45
  - 46
  - 47
  - 48
  - 49
  - 50
  - 51
  - 52
  - 53
  - 54
  - 55
  - 56
  - 57
  - 58
  - 59
  - 60
1. Are patients who are parents satisfied with the intervention *Child Talks*?
  2. Will the intervention *Child Talks* have an impact on patients who are parents in terms of parental competence?
  3. Will the intervention *Child Talks* have an impact on patients who are parents in terms of and parental concerns?

## Methods

### Participants

There are two main groups of participants in this study. The first group is mental health workers in the clinic ( $N = 220$ ), ranging from psychiatric nurses, psychologists, psychiatrists, social workers and different assistants. The second group of participants patients who are parents ( $N = 200$ ) receiving treatment in the clinic. [Patients admitted to this clinic typically have symptoms consistent with diagnoses such as mild, moderate and severe depression, anxiety disorders and psychoses.](#)

### Recruitment

The mental health workers in the clinic are recruited by the formal inclusion of the clinic in the research project. The management in the clinic has signed a contract for the collaboration with the research group, and all mental health workers are encouraged to answer the web-based questionnaires.

The intervention *Family Assessment Form* for patients/parents is mandatory for all mental health workers according to the law. The scales (PSOC and PEDS) are implemented in addition to this mandatory practice, but are included in the research project which the clinic has

1  
2  
3  
4  
5  
6  
7  
8 consented to participate in. Parents receiving treatment in the clinic are recruited to receive the  
9  
10 second intervention, *Child Talks* by the mental health worker who assesses the patient using  
11  
12 the *Family Assessment Form*.  
13

### 14 15 16 17 18 **Procedure**

19  
20 **Process evaluation.** This study will use a pre-test post-test with a one-year follow-up  
21  
22 design. At pre-test we will evaluate status quo among mental health workers in the clinic  
23  
24 regarding knowledge, attitudes, collaborative routines and clinical practice related to families  
25  
26 with parental mental illness. The expectations of the mental health workers regarding the  
27  
28 interventions will also be evaluated. This will be accomplished by web-based questionnaires  
29  
30 for all staff.

31  
32 After the pre-test is finished the project will move on to implement the interventions  
33  
34 *Family Assessment Form* and *Child Talks* in the clinic. The implementation starts with training  
35  
36 mental health workers in the interventions. The organisation Adults for Children will be  
37  
38 responsible for training and supervision of personnel in the clinic.

39  
40 At post-test and one year follow-up we will evaluate the impact of implementing the  
41  
42 *Family Assessment Form* in terms of how many children were identified and offered Child  
43  
44 Talks in the clinic or referred to other services for additional support. This will be elicited by  
45  
46 analyzing the content of *Family Assessment Form* for all patients in the clinic. The impact of  
47  
48 the intervention *Child Talks* will be evaluated in terms of actual changes of clinical practice  
49  
50 among mental health workers in the clinic, as well as expectations regarding the interventions.  
51  
52 Changes regarding health professionals' knowledge, attitude, collaborative routine and clinical  
53  
54

1  
2  
3  
4  
5  
6  
7  
8 practices will also be assessed by post-measures using web-based questionnaires to all staff. At  
9  
10 one year follow-up we will evaluate if changes in clinical practice are sustained.

11  
12 **Evaluation of the interventions impact on patients who are parents.** The design for  
13  
14 this group is a pre-post design. Patients will complete the *Family Assessment Form* once they  
15  
16 are admitted to treatment in the clinic. Questions about Parental concern (PEDS) [32] and  
17  
18 parental competence (PSOC) [33] will be included in the Family Assessment Form at pre-test.  
19  
20 The rationale for including the two latter scales is that information from parents relatively  
21  
22 correctly describes the emotional, social and behavioral development of their children.  
23  
24 Researchers have demonstrated that most children with significant socio-emotional and  
25  
26 behavior problems are shown to have parents with concerns, and that parents' concerns are  
27  
28 often as accurate as quality screening [34]. Furthermore, parent satisfaction (i.e. parents'  
29  
30 enjoyment of the parenting role) is negatively related to externalizing child behavior [35].

31  
32 When the intervention is implemented, all patients receiving the intervention will be  
33  
34 asked to fill out an evaluation form after the final session, addressing user-satisfaction, parental  
35  
36 competence (PSOC) and Parental concern (PEDS). Patients experience with the interventions  
37  
38 will be analyzed in terms of user satisfaction. Furthermore, changes between pre- and post  
39  
40 measures on the PEDS and PSOC will be analyzed to evaluate the impact of the intervention in  
41  
42 terms of parental competence and parental concerns about their children.

43  
44 Health professionals register the contents of each *Child Talk* session with the family.  
45  
46 Whether the intervention is delivered according to the protocol or not, is analyzed to assess  
47  
48 intervention integrity as well as to qualify the relationship between dose and response for all  
49  
50 participating families. This is vital to understand the variability of the impact on different  
51  
52 families.

## Measures

The selection of questionnaires consists of several different assessment instruments for the two different target groups.

### Process evaluation

*Questions about status quo in regular practice, changes in clinical practice one year after implementation and at one-year follow-up.* Materials are based on the Keeping Families and Children in Mind Online Resource – Evaluation, pre-training survey [36].

The questionnaire is adapted to the Norwegian context to assess the regular practice in the organization regarding how it deals with children of mentally ill parents before the implementation of new interventions, and changes in clinical practice after implementing the new interventions. Examples of topics to be explored are knowledge and attitudes about responsibilities for the children of patients, routines in the organization, staff's practice, and the collaborative process between the services in the municipalities and in the hospital.

*Evaluating training and supervision of staff.* Every member of the staff who participates in training and supervision related to the new interventions, will evaluate the quality and quantity of training using a standardized questionnaire. These data will be used to evaluate relationship between the quality of the training and whether the intervention was delivered according to the protocol.

*Evaluating the content of the logbook from Child Talks* [37]. Staff delivering the intervention will report on the manualized issues covered in the sessions with parents/patients and children, addressing who participated, concerns discussed, opportunities for support for the

1  
2  
3  
4  
5  
6  
7  
8 family, and needs for further activities/interventions to support the family. These data will be  
9  
10 used to evaluate if the intervention was delivered according to the protocol.

### 11 **Evaluation of the interventions impact on parents**

12  
13  
14 *Family Assessment Form.* To identify children of mentally ill patients a standardized  
15  
16 questionnaire about the demographical variables about the patient and the child is presented to  
17  
18 patients who are parents. Information about child age, gender, siblings, parental custody, others  
19  
20 carers for the child, and which information the child has received about the situation with the  
21  
22 parents collected. Furthermore, demographic data about the parents, the psychiatric history and  
23  
24 diagnosis of the patient is also collected in order to examine relationships between  
25  
26 demographic child and patient variables and intervention user satisfaction.

27  
28 *Parents' Evaluations of Developmental Status (PEDS)* [32]. Parents' concerns will be  
29  
30 elicited via a short form of a standardized questionnaire called PEDS. Glascoe and her  
31  
32 colleagues demonstrated that most children with significant socio-emotional and behavior  
33  
34 problems are shown to have parents with concerns, and that parents' concerns are often as  
35  
36 accurate as quality screening of the children [34]. The PEDS will indicate the level of problems  
37  
38 in child development, and changes in development.

39  
40 *Parents Sense of Competence (PSOC)* [33]. Parental competence will be elicited  
41  
42 via a standardized questionnaire called PSOC. Experiences of being a parent are related  
43  
44 to the developmental outcomes for children [38], and parents' experience of efficacy and  
45  
46 satisfaction in their role as a parent is evaluated to get information about these issues.  
47  
48 Two subscales measure efficacy (7 items,  $\alpha = 0.69$ ) and satisfaction (9 items,  $\alpha = 0.77$ ) in  
49  
50 parenting, and are computed by summing the scores within each scale.

1  
2  
3  
4  
5  
6  
7  
8  
9  
10  
11  
12  
13  
14  
15  
16  
17  
18  
19  
20  
21  
22  
23  
24  
25  
26  
27  
28  
29  
30  
31  
32  
33  
34  
35  
36  
37  
38  
39  
40  
41  
42  
43  
44  
45  
46  
47  
48  
49  
50  
51  
52  
53  
54  
55  
56  
57  
58  
59  
60

*Evaluating patient user satisfaction with the interventions.* Every patient who gives their consent to participate in the Child Talks intervention will be asked to evaluate their experience with the interventions via a user satisfaction questionnaire. There are 12 items exclusively related to satisfaction. An example is “The Child Talk intervention was useful to me as a parent”, and all items was answered using a five point Likert scale ranging from 1 “I totally disagree” to 5 “I totally agree”.

### **Intervention**

The interventions to be implemented are a standardized *Family Assessment Form* and the intervention called *Child Talks* developed and manualized in the Netherlands by Van Doesum and Koster [37]. The family assessment form is an intervention to identify children of mentally ill parents, and their needs. The intervention *Child Talks* is a health-promoting and preventive intervention where the mental health workers talk with the family about the situation of the children and their needs. This intervention is developed in the Netherlands [39], and has been part of regular practice for two decades there. The intervention comes with a manual that describes the process of carrying out three separate family conversations; one initial conversation with the patient and possibly his/her partner, followed by two conversations with the patient (and partner) and the children involved. The intervention allows the parents/patients to describe their children’s resources and vulnerability, and to participate in planning how they want their child to be informed of the family situation. The intervention includes the children through questions about their understanding and experiences of the family situation, and the children’s view of what may improve their situation. Adults for children has translated and adapted the intervention for use in Norway, and has published a

1  
2  
3  
4  
5  
6  
7  
8 pamphlet called “How do I help my child”, which is used as a tool for staff, parents and  
9 children in the conversations.  
10

11 *Intervention integrity.* The professionals will follow the manual for the intervention,  
12 and will complete standard check-lists (logbook) for each session to ensure this.  
13  
14

### 15 16 17 18 **Power analysis**

19 Two separate power analyses were conducted, one for the Process evaluation part, and  
20 one for the Evaluation of the intervention’s impact on patients.  
21

22 *Process evaluation:* In this case we based the power analysis on a t-test (paired samples)  
23 of the pre-post change in clinical practice among the health care workers. The effect size  
24 is expected to be small, but even a small change in clinical practice might be clinically  
25 valuable for the families meeting the health care service. Expecting an effect size of  
26 Cohen's  $d = 0.2$ , (two-tailed test and a significance level of .05), would result in a power  
27 of 0.80 with a sample of 199 participants.  
28

29 *Evaluation of the interventions impact on patients who are parents:* Target variables for  
30 the power analysis were Parental concern, and Parental efficacy and satisfaction.  
31

32 A small to medium intervention effect from pre to post is expected for these variables,  
33 and we want to be able to detect an effect of  $d = 0.25$  with power = 0.80 (two-tailed test  
34 and significance level of .05). In order to achieve this goal a sample of 128 participants is  
35 needed. Since a relatively large dropout from pre- to post test is expected, we aim to  
36 recruit at least 200 patients for this part of the study.  
37  
38

### 39 40 41 42 43 44 45 46 47 48 49 50 **Ethics**

1  
2  
3  
4  
5  
6  
7  
8 The study is considered by the Regional Committees for Ethics in Medical Research.  
9  
10 Their view is that it is a quality evaluation project aimed at improving diagnostic and  
11  
12 therapeutic practices, and hence it is not applicable for the committee. The project is  
13  
14 approved by the data protection officer (DPO) who has approved of the total protocol for  
15  
16 this project  
17

### 18 19 **Scientific and practical implications of the project**

20  
21 It is widely accepted that parenting behaviors influence the development of socio-  
22  
23 emotional and behavioral problems in children [40], and the quality of parenting a child receives is  
24  
25 considered to be the most potent but also the most modifiable risk factor contributing to the  
26  
27 development of behavioral and emotional problems in children [41]. Interventions to improve  
28  
29 parenting and the developmental path of children in families where one or both parents are  
30  
31 struggling with mental illness are much needed.

32  
33 The new Norwegian legislation regarding support for children of mentally ill parents  
34  
35 challenge all Norwegian psychiatric wards to change their practice related to patients who are  
36  
37 parents and their children. The mental health care service for adults is obligated to assess all  
38  
39 patients who are parents, and to act on their needs as parents. Results from this study will represent  
40  
41 an important, new and much needed contribution to the mental health services for children with  
42  
43 mentally ill parents. Furthermore, the effects of the implementation of the Family Assessment and  
44  
45 Child Talks interventions will be evaluated in terms of changes in personnel's practice and  
46  
47 collaboration between services, as well as patient's user satisfaction, parental competence and  
48  
49 parental concerns.

50  
51 An important limitation is that this study only examines child well-being based on parents'  
52  
53 perceptions, excluding other informants (i.e. preschool teachers, school teachers, public health -

Formatted: Font: Not Bold



1  
2  
3  
4  
5  
6  
7  
8 [nurses, relatives](#)). There is evidence to suggest a correlation between self-report measures of  
9  
10 parents and that of observers [42]. These correlations are by no means perfect, but they do give us  
11  
12 a certain degree of confidence in parents self-reports. Direct measures of child development and  
13  
14 observations of parent-child interactions are needed to further increase the confidence in the  
15  
16 results.

17  
18 **In conclusion:** ~~However,~~ implementing the intervention Child Talks in the clinic may lead  
19  
20 to clear identification and more referrals of children in need of more extensive interventions, ~~and~~  
21  
22 ~~This~~ study will lay the foundation for later evaluations of intervention effect for ~~the~~ children [with](#)  
23  
24 [mentally ill parents in such families](#).

Formatted: Normal, Indent: Left: -0.13",  
First line: 0.5", Right: -0.5", Line spacing:

### Acknowledgements

25  
26  
27  
28  
29  
30  
31 The study funded by the Norwegian Health Directorate and Regional centre for child and youth  
32  
33 mental health and child welfare, Faculty of Health Sciences, University of Tromsø.

### Author's contributions

34  
35  
36  
37  
38  
39 All authors participated in describing the design of this study. Reedtz and Lauritzen obtained  
40  
41 funding for this study. All authors drafted this manuscript. All authors read and approved this  
42  
43 manuscript.

### Competing interest

44  
45  
46  
47  
48 The authors declare that they have no competing interests.

## References

1. Torvik., F.A. & Rognmo., K. (2011). Barn av foreldre med psykiske lidelser eller alkoholmisbruk: Omfang og konsekvenser. Report 2011:4, The Norwegian Institute on Public Health, ISBN: 978-82-8082-461-5, retrieved from <http://www.fhi.no/dokumenter/0d04decc0b.pdf> on Monday the 3rd of October, 2011.
2. Beardslee, W. R., Versage, E. M., & Gladstone, T. R. G. (1998). Children of affectively ill parents: A review of the past 10 years. *Journal of the American Academy of Child and Adolescent Psychiatry*, 37, 1134-1141.
3. Gladstone, B. M., Boydell, K. M., Seeman, M. V., & Mckeever, P. D. (2011). Children's experiences of parental mental illness: a literature review. *Early intervention in Psychiatry*, DOI: 10.1111/j.1751-7893.2011.00287.x
4. Rutter, M., & Quinton, D. (1984). Parental Psychiatric Disorder: Effects on Children. *Psychological Medicine*, 14, 853-880.
5. West, M. O., & Prinz, R. J. (1987). Parental alcoholism and childhood psychopathology. *Psychological Bulletin*, 102, 204-218.
6. Beardslee, W. R., Versage, E. M., Velde, P. V. d., Swatling, S., & Hoke, L. (2002). The effects of parental dysfunction on children, in *Preventing depression in children through resiliency promotion: The Preventive Intervention Project*, (pp. 71-86). New York, NY: Kluwer Academic/Plenum Publishers; US.

- 1  
2  
3  
4  
5  
6  
7  
8  
9  
10  
11  
12  
13  
14  
15  
16  
17  
18  
19  
20  
21  
22  
23  
24  
25  
26  
27  
28  
29  
30  
31  
32  
33  
34  
35  
36  
37  
38  
39  
40  
41  
42  
43  
44  
45  
46  
47  
48  
49  
50  
51  
52  
53  
54  
55  
56  
57  
58  
59  
60
7. Goodman, S. H., & Gotlib, I. H. (2002). *Children of depressed parents: Mechanisms of risk and implications for treatment*. Washington, DC: American Psychological Association; US.
8. Goodman, S. H., Rouse, M. H., Connell, A. M., Broth, M. R., Hall, C. M., & Heyward, D. (2011). Maternal depression and child psychopathology: A meta-analytic review. *Clinical Child and Family Psychology Review*, 14, 1-27.
9. Bauer, N. S., & Webster-Stratton, C. (2006). Prevention of behavioral disorders in primary care. *Current Opinion in Pediatrics*, 18, 654-660.
10. Foster, E. M., Prinz, R. J., Sanders, M. R., & Shapiro, C. J. (2008). The costs of a public health infrastructure for delivering parenting and family support. *Children and Youth Services Review*, 30, 493-501.
11. Gardner, F., Sonuga-Barke, E. J. S., & Sayal, K. (1999). Parents Anticipating Misbehaviour: An Observational Study of Strategies Parents Use to Prevent Conflict with Behaviour Problem Children. *The Journal of Child Psychology and Psychiatry and Allied Disciplines*, 40, 1185-1196.
12. Granic, I., & Patterson, G. R. (2006). Toward a comprehensive model of antisocial development: A dynamic systems approach. *Psychological Review*, 113, 101-131.
13. Murray, L., Sinclair, D., Cooper, P., Ducournau, P., & Turner, P. (1999). The socioemotional development of 5-year-old children of postnatally depressed mothers. *Journal of Child Psychology and Psychiatry*, 40, 1259-1271.
14. Bifulco, A., Moran, P., Ball, C., Jacobs, C., Baines, R., Bunn, A., et al. (2002). Childhood adversity, parental vulnerability and disorder: Examining inter-

- 1  
2  
3  
4  
5  
6  
7  
8 generational transmission of risk. *Journal of Child Psychology and Psychiatry*,  
9 43, 1075-1086.
- 10  
11
- 12 15. Duggal, S., Carlson, E. A., Sroufe, L., & Egeland, B. (2001). Depressive  
13  
14 symptomatology in childhood and adolescence. *Development and*  
15  
16 *Psychopathology*, 13, 143-164.
- 17
- 18 16. Elgar, F. J., Mills, R. S., McGrath, P. J., Waschbusch, D. A., & Brownridge, D.  
19  
20 A. (2007). Maternal and paternal depressive symptoms and child maladjustment:  
21  
22 The mediating role of parental behavior. *Journal of Abnormal Child Psychology*:  
23  
24 *An official publication of the International Society for Research in Child and*  
25  
26 *Adolescent Psychopathology*, 35, 943-955.
- 27
- 28 17. Harnish, J. D., Dodge, K. A., & Valente, E. (1995). Mother-child interaction  
29  
30 quality as a partial mediator of the roles of maternal depressive symptomatology  
31  
32 and socioeconomic status in the development of child behavior problems. *Child*  
33  
34 *Development*, 66, 739-753.
- 35
- 36 18. Hosman, C. M. H., Van Doesum, K. T. M., & Van Santvoort, F. (2009).  
37  
38 Prevention of emotional problems and psychiatric risks in children of parents  
39  
40 with a mental illness in the Netherlands: I. The scientific basis to a  
41  
42 comprehensive approach. *Australian e-Journal for the Advancement of Mental*  
43  
44 *Health* 8, 250-263.
- 45
- 46 19. Murray, L., Cooper, P., & Hipwell, A. (2003). Mental health of parents caring for  
47  
48 infants. *Archives of Women's Mental Health*, 6, 71-77.
- 49  
50  
51  
52  
53  
54  
55  
56  
57  
58  
59  
60

- 1  
2  
3  
4  
5  
6  
7  
8  
9  
10  
11  
12  
13  
14  
15  
16  
17  
18  
19  
20  
21  
22  
23  
24  
25  
26  
27  
28  
29  
30  
31  
32  
33  
34  
35  
36  
37  
38  
39  
40  
41  
42  
43  
44  
45  
46  
47  
48  
49  
50  
51  
52  
53  
54  
55  
56  
57  
58  
59  
60
20. Beardslee, W. R., Wright, E. J., Gladstone, T. R., & Forbes, P. (2007). Long-term effects from a randomized trial of two public health preventive interventions for parental depression. *Journal of Family Psychology*, *21*, 703-713.
21. Fraser, C., James, E. L., Anderson, K., Lloyd, D., & Judd, F. (2006). Intervention Programs for Children of Parents with a Mental Illness: A Critical Review. *The International Journal of Mental Health Promotion*, *8*, 9-20.
22. Reupert, A., & Maybery, D. (2011). Programs for parents with a mental illness. *Journal of Psychiatric and Mental Health Nursing*, *18*, 257-264.
23. van Doesum, K. T., Riksen-Walraven, J., Hosman, C. M., & Hoefnagels, C. (2008). A randomized controlled trial of a home-visiting intervention aimed at preventing relationship problems in depressed mothers and their infants. *Child Development*, *79*, 547-561.
24. Sanders, M., Calam, R., Durand, M., Liversidge, T., & Carmont, S. A. (2008). Does self-directed and web-based support for parents enhance the effects of viewing a reality television series based on the triple P - Positive Parenting programme? *Journal of Child Psychology and Psychiatry*, *49*, 924-932.
25. Aamodt, G., & Aamodt, I. (2005): Tiltak for barn med psykisk syke foreldre [Interventions for Children of Mentally Ill Parents]. Report. RBUP Øst/Sør.
26. Maybery, D., & Reupert, A. (2006). Workforce capacity to respond to children whose parents have a mental illness. *Australian and New Zealand Journal of Psychiatry*, *40*, 657-664.
27. The Ministry of Health and Care Services. (2009). Changes in the law, downloaded from

- 1  
2  
3  
4  
5  
6  
7  
8 <http://www.regjeringen.no/pages/2188713/PDFS/OTP200820090084000DDDPD>  
9 [FS.pdf](#) on the 3rd of October, 2011.
- 10  
11  
12 28. Fixsen, D. L., Naoom, S. F., Blasé, K. A., Friedman, R. M. & Wallace, F. (2005).  
13  
14 *Implementation Research: A synthesis of the literature*. University of South  
15  
16 Florida, Tampa. Downloaded from  
17  
18 <http://cfs.cbcs.usf.edu/publications/detail.cfm?id=137> on the 20<sup>th</sup> of October,  
19  
20 2011.
- 21  
22 29. Maybery, D., & Reupert, A. (2009). Parental mental illness: A review of barriers  
23  
24 and issues for working with families and children. *Journal of Psychiatric and*  
25  
26 *Mental Health Nursing*, 16(9), 784-791.
- 27  
28 30. Ogden, T. (2010). *Familiebasert behandling av alvorlige atferdsproblemer blant*  
29  
30 *barn og ungdom. Evaluering og implementering av evidensbaserte*  
31  
32 *behandlingsprogrammer i Norge* [Family based treatment of ODD and CD  
33  
34 among children and adolescents. Evaluation and implementation of evidence-  
35  
36 based treatment programs in Norway]. Dissertation. University of Bergen,  
37  
38 Norway. ISBN 978-82-308-1647-9.
- 39  
40 31. Glascoe, F. P. (2003). Parents' evaluation of developmental status: How well do  
41  
42 parents' concerns identify children with behavioral and emotional problems?  
43  
44 *Clinical Pediatrics*, 42, 133-138.
- 45  
46  
47 32. Glascoe, F.P. (1997). Parents' concerns about children's development:  
48  
49 Prescreening Technique or Screening Test? *Pediatrics*, 99, 522-528.
- 50  
51  
52  
53  
54  
55  
56  
57  
58  
59  
60

- 1  
2  
3  
4  
5  
6  
7  
8  
9  
10  
11  
12  
13  
14  
15  
16  
17  
18  
19  
20  
21  
22  
23  
24  
25  
26  
27  
28  
29  
30  
31  
32  
33  
34  
35  
36  
37  
38  
39  
40  
41  
42  
43  
44  
45  
46  
47  
48  
49  
50  
51  
52  
53  
54  
55  
56  
57  
58  
59  
60
33. Johnston, C., & Mash, E. J. (1989). A measure of parenting satisfaction and efficacy. *Journal of Clinical Child Psychology*, 18, 167-175.
34. Glascoe, F. P. (2003). Parents' evaluation of developmental status: How well do parents' concerns identify children with behavioral and emotional problems? *Clinical Pediatrics*, 42, 133.
35. Ohan, J. L., Leung, D. W., & Johnston, C. (2000). The Parenting Sense of Competence Scale: Evidence of a stable factor structure and validity. *Canadian Journal of Behavioural Science*, 32, 251-261.
36. Mayberry, Goodyear & Reupert. (2011). Keeping Families and Children in Mind Online Resource – Evaluation, pre-training survey. Downloaded from [http://www.copmi.net.au/worked/files/WFD\\_Res\\_Eval\\_POST\\_100210.pdf](http://www.copmi.net.au/worked/files/WFD_Res_Eval_POST_100210.pdf) on the 14th of October, 2011.
37. Van Doesum, K. T. M., & Koster, C. (2008). *KOPP Praten met ouders kinderen: Handleiding preventieve huisbezoeken voor ouders met psychiatrische problemen en hun kinderen (Manual Child Talks)*. Deventer, the Netherlands: Dimence, Community mental health center.
38. Reedtz, C., Handegard, B. H., & Morch, W.T. (2011). Promoting positive parenting practices in primary care: Outcomes and mechanisms of change in a randomized controlled risk reduction trial. *Scandinavian Journal of Psychology*, 52, 131-137.
39. Van Doesum, K. T. M., & Hosman, C. M. H. (2009). Prevention of emotional problems and psychiatric risks in children of parents with a mental illness in the

1  
2  
3  
4  
5  
6  
7  
8 Netherlands: II. Interventions. *Australian e-Journal for the Advancement of*  
9 *Mental Health*, 8, 264-267.

10  
11  
12 40. Hutchings, J., & Lane, E. (2005). Parenting and the development and prevention  
13 of child mental health problems. *Current Opinion in Psychiatry*, 18, 386-391.

14  
15  
16 41. Morawska, A., Winter, L., & Sanders, M. R. (2009). Parenting knowledge and its  
17 role in the prediction of dysfunctional parenting and disruptive child behaviour.  
18 *Child: Care, Health and Development*, 35, 217-226.

19  
20  
21 42. Zubrick, S. R., Ward, K. A., Silburn, S. R., Lawrence, D., Williams, A. A., Blair,  
22 E., et al. (2005). Prevention of child behavior problems through universal  
23 implementation of a group behavioral family intervention. *Prevention Science*, 6,  
24 287-304.  
25  
26  
27  
28  
29  
30  
31  
32  
33  
34  
35  
36  
37  
38  
39  
40  
41  
42  
43  
44  
45  
46  
47  
48  
49  
50  
51  
52  
53  
54  
55  
56  
57  
58  
59  
60
